# Supplementary material
Source: HighWire-hosted journal article supplement (https://spcare.bmj.com/content/13/e3/e515)
Supplement: inline-supplementary-material-1 [file inline-supplementary-material-1.pdf]

## OID FOR MEDLINE SEARCH STRATEGY

### Parenteral nutrition

- 1 intestinal obstruction/ or duodenal obstruction/ or intestine obstruction/
- 2 ((bowel\* or intestin\* or gastrointestin\* or gastro intestin\* or colon\* or colorect\* or retrosigmoid\*) adj3 (obstruct\* or occlu\* or block\*)).ti,ab,kw.
- 3 1 or 2
- 4 exp Genital Neoplasm, Female/ or exp Ovarian Neoplasm/
- 5 ((ovar\* or uterine or vaginal or vulva\* or cervi\* or gynae\* or gyne\*) adj3 (neoplasm\* or tumor\* or tumour\* or cancer\* or malignan\* or carcinoma\* or adenocarcinoma\* or carcinosarcoma\* or sarcoma\*)).ti,ab,kw.
- 6 exp Intestinal Neoplasm/ or digestive system neoplasm/ or gastrointestinal neoplasm/ or peritoneal neoplasm/
- 7 ((neoplasm\* or tumor\* or tumour\* or cancer\* or malignan\* or carcinoma\* or adenocarcinoma\* or carcinosarcoma\* or sarcoma\*) adj3 (rectal\* or colorectal\* or anal\* or colo\* or intestin\* or abdominal or digest\*)).ti,ab,kw.
- 8 4 or 5 or 6 or 7
- 9 Neoplasm/co or \*Neoplasm/th
- 10 ((end stage\* or incurable\* or advanced\*) adj3 cancer\*).ti,ab,kw. or palliative care/ or terminal care/ or hospice care/
- 11 3 and 8 [obstruction and specific cancers]
- 12 malignan\*.ti,ab,kw.
- 13 3 and 12 [obstruction and maligan\*]
- 14 9 and 10 [cancer complications or focused cancer therapy]
- 15 11 or 13 or 14
- 16 exp Parenteral Nutrition/
- 17 Parenteral Nutrition, Home/
- 18 (total parenteral nutrition\* or TPN\* or parenteral nutrition\* or PN\*).mp.
- 19 ((parenteral\* or artificial\* or tub\* or catheter\* or intraven\* or IV\* or subcutan\* or bypas\*) adj3 (nutri\* or hydration\* or feed\* or fed\* or treatment\* or manag\* or method\* or car\* or support\* or diet\*)).mp.
- 20 parenteral nutrition.mp. or parenteral nutrition/ or nutrition supplement/
- 21 16 or 17 or 18 or 19 or 20 [ parenteral nutrition]
- 22 15 and 21

**Gastrostomy**

- 1 intestinal obstruction/ or duodenal obstruction/ or intestine obstruction/
- 2 ((bowel\* or intestin\* or gastrointestin\* or gastro intestin\* or colon\* or colorect\* or retrosigmoid\*) adj3 (obstruct\* or occlu\* or block\*)).ti,ab,kw.
- 3 1 or 2
- 4 exp Genital Neoplasm, Female/ or exp Ovarian Neoplasm/
- 5 ((ovar\* or uterine or vaginal or vulva\* or cervi\* or gynae\* or gyne\*) adj3 (neoplasm\* or tumor\* or tumour\* or cancer\* or malignan\* or carcinoma\* or adenocarcinoma\* or carcinosarcoma\* or sarcoma\*)).ti,ab,kw.
- 6 exp Intestinal Neoplasm/ or digestive system neoplasm/ or gastrointestinal neoplasm/ or peritoneal neoplasm/
- 7 ((neoplasm\* or tumor\* or tumour\* or cancer\* or malignan\* or carcinoma\* or adenocarcinoma\* or carcinosarcoma\* or sarcoma\*) adj3 (rectal\* or colorectal\* or anal\* or colo\* or intestin\* or abdominal or digest\*)).ti,ab,kw.
- 8 4 or 5 or 6 or 7
- 9 Neoplasm/co or \*Neoplasm/th
- 10 ((end stage\* or incurable\* or advanced\*) adj3 cancer\*).ti,ab,kw. or palliative care/ or terminal care/ or hospice care/
- 11 3 and 8 [obstruction and specific cancers]
- 12 malignan\*.ti,ab,kw.
- 13 3 and 12 [obstruction and maligan\*]
- 14 9 and 10 [cancer complications or focused cancer therapy]
- 15 11 or 13 or 14
- 16 Gastrostomy/ or Gastroscopy/ or Jejunostomy/ or Gastrostomy\*.mp. or Gastroscopy\*.mp. or Jejunostomy\*.mp. [mp=title, abstract, original title, name of substance word, subject heading word, floating sub-heading word, keyword heading word, organism supplementary concept word, protocol supplementary concept word, rare disease supplementary concept word, unique identifier, synonyms]
- 17 Decompression, Surgical/
- 18 Intubation, Gastrointestinal.mp. or Intubation, Gastrointestinal/
- 19 Intubation, Gastrointestinal/
- 20 gastrointestinal intubation tube/ or duodenum intubation/ or digestive tract intubation/ or stomach intubation/
- 21 ((gastrosom\* or gastroscop\* or jejunos\* or percutan\* or peg\* or jej\* or decomp\* or intub\*) adj3 (obstruct\* or occlu\* or block\* or decomp\* or intub\*)).ti,ab,kw.

- 22 gastrostomy catheter/ or gastrostomy/ or percutaneous endoscopic gastrostomy tube/  
or gastrostomy.mp. or percutaneous endoscopic gastrostomy/ or gastrostomy device/
- 23 Gastrostom\$.mp.
- 24 16 or 17 or 18 or 19 or 20 or 21 or 22 or 23
- 25 15 and 24

## OID EMBASE SEARCH STRATEGY

### Parenteral nutrition

1. intestinal obstruction/ or duodenal obstruction/ or intestine obstruction
2. ((bowel\* or intestin\* or gastrointestin\* or gastro intestin\* or colon\* or colorect\* or retrosigmoid\*) adj3 (obstruct\* or occlu\* or block\*)).ti,ab,kw.
3. 1 or 2
4. exp Genital Neoplasm, Female/ or exp Ovarian Neoplasm/
5. ((ovar\* or uterine or vaginal or vulva\* or cervi\* or gynae\* or gyne\*) adj3 (neoplasm\* or tumor\* or tumour\* or cancer\* or malignan\* or carcinoma\* or adenocarcinoma\* or carcinosarcoma\* or sarcoma\*)).ti,ab,kw.
6. exp Intestinal Neoplasm/ or digestive system neoplasm/ or gastrointestinal neoplasm/ or peritoneal neoplasm/
7. ((neoplasm\* or tumor\* or tumour\* or cancer\* or malignan\* or carcinoma\* or adenocarcinoma\* or carcinosarcoma\* or sarcoma\*) adj3 (rectal\* or colorectal\* or anal\* or colo\* or intestin\* or abdominal or digest\*)).ti,ab,kw.
8. 4 or 5 or 6 or 7
9. Neoplasm/co or \*Neoplasm/th
10. ((end stage\* or incurable\* or advanced\*) adj3 cancer\*).ti,ab,kw. or palliative care/ or terminal care/ or hospice care/
11. 3 and 8 [obstruction and specific cancers]
12. malignan\*.ti,ab,kw.
13. 3 and 12 [obstruction and malign\*]
14. 9 and 10 [cancer complications or focused cancer therapy]
15. 11 or 13 or 14
16. exp Parenteral Nutrition/
17. Parenteral Nutrition, Home/
18. (total parenteral nutrition\* or TPN\* or parenteral nutrition\* or PN\*).mp.
19. ((parenteral\* or artificial\* or tub\* or catheter\* or intraven\* or IV\* or subcutan\* or bypas\*) adj3 (nutri\* or hydration\* or feed\* or fed\* or treatment\* or manag\* or method\* or car\* or support\* or diet\*)).mp.
20. 16 or 17 or 18 or 19 [ parenteral nutrition]
21. 15 and 20

**Gastrostomy**

- 1 intestinal obstruction/ or duodenal obstruction/ or intestine obstruction/
- 2 ((bowel\* or intestin\* or gastrointestin\* or gastro intestin\* or colon\* or colorect\* or retrosigmoid\*) adj3 (obstruct\* or occlu\* or block\*)).ti,ab,kw.
- 3 1 or 2
- 4 exp Genital Neoplasm, Female/ or exp Ovarian Neoplasm/
- 5 ((ovar\* or uterine or vaginal or vulva\* or cervi\* or gynae\* or gyne\*) adj3 (neoplasm\* or tumor\* or tumour\* or cancer\* or malignan\* or carcinoma\* or adenocarcinoma\* or carcinosarcoma\* or sarcoma\*)).ti,ab,kw.
- 6 exp Intestinal Neoplasm/ or digestive system neoplasm/ or gastrointestinal neoplasm/ or peritoneal neoplasm/
- 7 ((neoplasm\* or tumor\* or tumour\* or cancer\* or malignan\* or carcinoma\* or adenocarcinoma\* or carcinosarcoma\* or sarcoma\*) adj3 (rectal\* or colorectal\* or anal\* or colo\* or intestin\* or abdominal or digest\*)).ti,ab,kw.
- 8 4 or 5 or 6 or 7
- 9 Neoplasm/co or \*Neoplasm/th
- 10 ((end stage\* or incurable\* or advanced\*) adj3 cancer\*).ti,ab,kw. or palliative care/ or terminal care/ or hospice care/
- 11 3 and 8 [obstruction and specific cancers]
- 12 malignan\*.ti,ab,kw.
- 13 3 and 12 [obstruction and malignan\*]
- 14 9 and 10 [cancer complications or focused cancer therapy]
- 15 11 or 13 or 14
- 16 Gastrostomy/ or Gastroscopy/ or Jejunostomy/ or Gastrostomy\*.mp. or Gastroscopy\*.mp. or Jejunostomy\*.mp. [mp=title, abstract, original title, name of substance word, subject heading word, floating sub-heading word, keyword heading word, organism supplementary concept word, protocol supplementary concept word, rare disease supplementary concept word, unique identifier, synonyms]
- 17 Decompression, Surgical/
- 18 Intubation, Gastrointestinal.mp. or Intubation, Gastrointestinal/
- 19 Intubation, Gastrointestinal/
- 20 gastrointestinal intubation tube/ or duodenum intubation/ or digestive tract intubation/ or stomach intubation/0
- 21 ((gastrosom\* or gastroscop\* or jejunos\* or percutan\* or peg\* or jej\* or decomp\* or intub\*) adj3 (obstruct\* or occlu\* or block\* or decomp\* or intub\*)).ti,ab,kw.

- 22 gastrostomy catheter/ or gastrostomy/ or percutaneous endoscopic gastrostomy tube/  
or gastrostomy.mp. or percutaneous endoscopic gastrostomy/ or gastrostomy device/
- 23 Gastrostom\$.mp.
- 24 16 or 17 or 18 or 19 or 20 or 21 or 22 or 23
- 25 15 and 24

## CENTRAL SEARCH STRATEGY

### Parenteral nutrition

- #1 MeSH descriptor: [Intestinal Obstruction] explode all trees
- #2 MeSH descriptor: [Duodenal Obstruction] explode all trees
- #3 ((bowel\* or intestin\* or gastrointestin\* or gastro intestin\* or colon\* or colorect\* or retrosigmoid\*) near/3 (obstruct\* or occlu\* or block\*))
- #4 #1 or #2 or #3
- #5 MeSH descriptor: [Intestinal Neoplasms] explode all trees
- #6 MeSH descriptor: [Gastrointestinal Neoplasms] explode all trees
- #7 MeSH descriptor: [Peritoneal Neoplasms] explode all trees
- #8 MeSH descriptor: [Digestive System Neoplasms] explode all trees
- #9 MeSH descriptor: [Ovarian Neoplasms] explode all trees
- #10 #5 or #6 or #7 or #8 or #9
- #11 ((end stage\* or incurable\* or advanced\*) near/3 (cancer or palliative care or terminal care or hospice care))
- #12 ((neoplasm\* or tumor\* or tumour\* or cancer\* or malignan\* or carcinoma\* or adenocarcinoma\* or carcinosarcoma\* or sarcoma\*) next/3 (rectal\* or colorectal\* or anal\* or colo\* or intestin\* or abdominal or digest\*))
- #13 ((ovar\* or uterine or vaginal or vulva\* or cervi\* or gynae\* or gyne\*) next/3 (neoplasm\* or tumor\* or tumour\* or cancer\* or malignan\* or carcinoma\* or adenocarcinoma\* or carcinosarcoma\* or sarcoma\*))
- #14 #11 or #12 or #13
- #15 #10 or #14
- #16 #4 and #15
- #17 MeSH descriptor: [Parenteral Nutrition] explode all trees
- #18 (total parenteral nutrition\* or TPN\* or parenteral nutrition\* or PN\*)
- #19 ((parenteral\* or artificial\* or tub\* or catheter\* or intraven\* or IV\* or subcutan\* or bypas\*) near/3 (nutri\* or hydration\* or feed\* or fed\* or treatment\* or manag\* or method\* or car\* or support\* or diet\*))
- #20 #17 or #18 or #19
- #21 #16 and #20

## Gastrostomy

- #1 MeSH descriptor: [Intestinal Obstruction] explode all trees
- #2 MeSH descriptor: [Duodenal Obstruction] explode all trees
- #3 ((bowel\* or intestin\* or gastrointestin\* or gastro intestin\* or colon\* or colorect\* or retrosigmoid\*) near/3 (obstruct\* or occlu\* or block\*))
- #4 #1 or #2 or #3
- #5 MeSH descriptor: [Intestinal Neoplasms] explode all trees
- #6 MeSH descriptor: [Gastrointestinal Neoplasms] explode all trees
- #7 MeSH descriptor: [Peritoneal Neoplasms] explode all trees
- #8 MeSH descriptor: [Digestive System Neoplasms] explode all trees
- #9 MeSH descriptor: [Ovarian Neoplasms] explode all trees
- #10 #5 or #6 or #7 or #8 or #9
- #11 ((end stage\* or incurable\* or advanced\*) near/3 (cancer or palliative care or terminal care or hospice care))
- #12 ((neoplasm\* or tumor\* or tumour\* or cancer\* or malignan\* or carcinoma\* or adenocarcinoma\* or carcinosarcoma\* or sarcoma\*) near/3 (rectal\* or colorectal\* or anal\* or colo\* or intestin\* or abdominal or digest\*))
- #13 ((ovar\* or uterine or vaginal or vulva\* or cervi\* or gynae\* or gyne\*) near/3 (neoplasm\* or tumor\* or tumour\* or cancer\* or malignan\* or carcinoma\* or adenocarcinoma\* or carcinosarcoma\* or sarcoma\*))
- #14 #11 or #12 or #13
- #15 #10 or #14
- #16 #4 and #15
- #17 MeSH descriptor: [Gastrostomy] explode all trees
- #18 MeSH descriptor: [Gastroscopy] explode all trees
- #19 MeSH descriptor: [Intubation] explode all trees
- #20 MeSH descriptor: [Intubation, Gastrointestinal] explode all trees
- #21 MeSH descriptor: [Decompression, Surgical] explode all trees
- #22 MeSH descriptor: [Enteral Nutrition] explode all trees
- #23 Gastros\*
- #24 #17 or #18 or #19 or #20 or #21 #22 or #23
- #25 #16 and #24



**EBSCO FOR CINAHL COMPLETE****Parenteral nutrition**

malignant bowel obstruction OR ( advanced cancer or metastatic cancer or terminal cancer or palliative cancer or cancer ) AND ( parenteral nutrition or total parenteral nutrition or tpn )

**Gastrostomy**

malignant bowel obstruction OR ( advanced cancer or metastatic cancer or terminal cancer or palliative cancer or cancer ) AND gastrostomy

**WEB OF SCIENCE****Parenteral nutrition**

# 1 TOPIC: (Intestinal Obstruction\* OR malignant bowel obstruction\*)

# 2 TOPIC: (Parenteral nutrition)

# 3 #2 AND #1

**Gastrostomy**

# 1 TOPIC: (Intestinal Obstruction\* OR malignant bowel obstruction\*)

# 2 TOPIC: (Gastrostomy)

# 3 #2 AND #1

**For BASE (Bielefeld Academic Search Engine), Caresearch (grey literature), ClinicalTrials.gov, EU Clinical Trials Register and the World Health Organization (WHO) International Clinical Trials Registry Platform (ICTRP) we combined terms for malignant bowel obstruction AND parenteral nutrition or gastrostomy.**

## Searches prior to deduplication.

| Database                                                                | Parenteral nutrition (2020) | Gastrostomy (2020) | Parenteral nutrition (2021) | Gastrostomy (2021) |
|-------------------------------------------------------------------------|-----------------------------|--------------------|-----------------------------|--------------------|
| Medline                                                                 | 730                         | 808                | 56                          | 54                 |
| Embase                                                                  | 1394                        | 1243               | 51                          | 76                 |
| Central                                                                 | 148                         | 32                 | 5                           | 1                  |
| CINHAL                                                                  | 1212                        | 111                | 64                          | 49                 |
| Web of science                                                          | 458                         | 181                | 28                          | 11                 |
| Caresearch                                                              | 269                         | 15                 | 0                           | 0                  |
| BASE                                                                    | 515                         | 69                 | 38                          | 0                  |
| Clinicaltrials.gov                                                      | 224                         | 10                 | 0                           | 0                  |
| EU Clinical Trials Register                                             | 21                          | 16                 | 0                           | 0                  |
| WHO ICTRP                                                               | 9                           | 13                 | 0                           | 0                  |
| Citation Searches of Selected key studies of particular importance= 136 |                             |                    |                             |                    |
