# Supplementary material
Source: HighWire-hosted journal article supplement (https://spcare.bmj.com/content/13/e3/e515)
Supplement: inline-supplementary-material-2 [file inline-supplementary-material-2.pdf]

## CASP COHORT STUDY CHECKLIST

| STUDY              | 1 | 2 | 3 | 4 | 5a | 5b | 6a | 6b | 7 | 8 | 9 | 10 | Comments                                                                    |
|--------------------|---|---|---|---|----|----|----|----|---|---|---|----|-----------------------------------------------------------------------------|
| Abu-Rustum 1997    | ? | • | • | • | ×  | ×  | •  | •  | ? | × | • | ×  | unclear aim, risk of biases, risk of confounding, data presentation         |
| Aria Guerra 2015   | • | • | • | • | ×  | •  | •  | •  | • | • | • | •  | risk of biases, risk of confounding,                                        |
| August 1991        | • | ? | × | × | ×  | ×  | •  | •  | ? | ? | ? | ?  | risk of biases, risk of confounding, data presentation                      |
| Bond 2019          | ? | • | • | • | ×  | ×  | •  | •  | • | • | • | ?  | risk of biases, risk of confounding                                         |
| Bozzetti 2002      | • | × | • | • | ×  | •  | •  | •  | • | • | • | •  | risk of biases, risk of confounding,                                        |
| Brard 2006         | • | × | • | • | ×  | ×  | •  | •  | • | • | ? | ×  | risk of confounding, risk of selection bias,                                |
| Chermesh 2011      | ? | • | ? | ? | ×  | ×  | •  | •  | • | × | • | •  | unclear aim, risk of confounding, data presentation                         |
| Chouhan 2016       | • | • | • | • | •  | ×  | •  | •  | • | • | • | •  | risk of confounding,                                                        |
| Cotogni 2017       | • | • | • | • | •  | •  | •  | •  | • | • | • | ?  |                                                                             |
| Duerksen 2004      | • | • | × | • | ×  | ×  | •  | •  | • | × | • | ?  | risk of selection bias, risk of confounding, data presentation              |
| Dzierianowski 2021 | • | • | × | • | •  | •  | •  | •  | • | • | • | •  | risk of selection bias,                                                     |
| Fan 2007           | ? | • | × | • | ×  | ×  | •  | •  | • | × | • | •  | risk of selection bias, risk of confounding, data presentation              |
| Keane 2018         | • | • | ? | • | •  | •  | •  | •  | • | • | • | •  | risk of selection bias                                                      |
| King 1993          | • | • | • | × | ×  | ×  | •  | •  | • | • | • | •  | risk of reporting bias, risk of confounding,                                |
| Mercadante 1995    | ? | ? | • | • | ×  | ×  | •  | •  | × | × | • | •  | unclear aim, risk of biases, risk of confounding, data presentation         |
| Patel 2021         | • | • | ? | ? | •  | •  | •  | •  | • | • | • | •  | risk of bias, risk of confounding,                                          |
| Ruggeri 2020       | • | • | • | • | ×  | ×  | •  | •  | • | • | • | •  | risk of bias, risk of confounding,                                          |
| Santarpia 2006     | ? | • | • | • | •  | •  | ×  | ×  | • | • | • | •  | unclear aim, risk of bias                                                   |
| Soo 2018           | • | • | • | • | ×  | ×  | •  | ?  | • | × | • | •  |                                                                             |
| Adelson 1993       | ? | ? | ? | × | ×  | ×  | •  | •  | ? | × | • | ×  | unclear aim, risk of biases, risk of confounding, data presentation         |
| Arvieux 2005       | • | • | ? | ? | ×  | ×  | •  | •  | ? | ? | ? | ×  | risk of biases, risk of confounding, unclear data presentation              |
| Brooksbank 2002    | ? | • | • | × | ×  | ×  | •  | •  | ? | × | • | •  | unclear aim, risk of biases, risk of confounding,                           |
| Cannizzaro 1995    | • | • | • | • | ×  | ×  | ?  | ?  | • | ? | • | •  | risk of biases, risk of confounding,                                        |
| Champagnutta 1998  | • | • | ? | • | ×  | ×  | ?  | ?  | • | • | • | •  | risk of biases, risk of confounding,                                        |
| Cunningham 1995    | ? | • | • | × | ×  | ×  | ?  | •  | ? | ? | • | •  | unclear aim, risk of biases, risk of confounding, unclear data presentation |
| Diver 2013         | ? | • | • | • | ×  | ×  | •  | •  | • | • | • | •  | risk of biases, risk of confounding,                                        |

|                        |   |   |   |   |   |   |   |   |   |   |   |   |   |                                                                             |
|------------------------|---|---|---|---|---|---|---|---|---|---|---|---|---|-----------------------------------------------------------------------------|
| <b>Dittrich 2017</b>   | • | × | • | ? | • | • | • | • | • | • | • | • | • | risk of biases,                                                             |
| <b>Gauvin 2021</b>     | • | ? | • | • | × | × | • | • | • | • | • | • | • | risk of confounding,                                                        |
| <b>Goldberg 2021</b>   | • | • | • | ? | × | × | • | • | • | • | • | • | • | risk of measurement bias, risk of confounding,                              |
| <b>Herman 1992</b>     | ? | • | × | × | × | × | • | • | ? | ? | • | • | • | risk of biases, risk of confounding, data presentation                      |
| <b>Issaka 2014</b>     | • | ? | • | × | × | × | • | • | • | • | • | • | • | risk of confounding,                                                        |
| <b>Jolicoeur 2003</b>  | • | ? | • | • | × | × | • | • | ? | ? | • | • | • | risk of biases, risk of confounding, unclear data presentation              |
| <b>Kawata 2014</b>     | • | ? | • | × | × | × | ? | • | • | • | • | • | • | risk of reporting biases, risk of confounding,                              |
| <b>Lilley 2018</b>     | • | ? | • | • | • | • | • | • | • | • | • | • | ? | risk of selection bias                                                      |
| <b>Merchant 2020</b>   | • | • | • | • | × | • | • | • | • | • | • | • | • | risk of confounding,                                                        |
| <b>Pothuri 2005</b>    | • | • | • | • | × | × | • | • | • | • | • | • | • | risk of biases, risk of confounding                                         |
| <b>Rath 2013</b>       | • | • | • | • | × | × | • | • | • | • | • | • | • | risk of biases, risk of confounding                                         |
| <b>Scheidbach 1999</b> | ? | • | • | × | × | × | • | • | • | • | • | • | • | risk of biases, risk of confounding,                                        |
| <b>Teriaky 2012</b>    | • | • | • | • | × | × | ? | × | ? | • | × | • | • | risk of biases, risk of confounding, unclear data presentation              |
| <b>Vashi 2012</b>      | ? | • | • | × | × | × | ? | ? | • | ? | • | • | • | unclear aim, risk of biases, risk of confounding, unclear data presentation |
| <b>Zucchi 2016</b>     | • | • | • | • | × | × | • | • | • | • | • | • | • | risk of confounding,                                                        |

### CASP QUALITATIVE STUDIES CHECKLIST

| STUDY            | 1 | 2 | 3 | 4 | 5 | 6 | 7 | 8 | 9 | 10 | Comments                                                                      |
|------------------|---|---|---|---|---|---|---|---|---|----|-------------------------------------------------------------------------------|
| Sowerbutts 2019  | • | • | • | • | • | ? | • | • | • | •  | unclear reflexivity in research design,                                       |
| Sowerbutts 2020a | • | • | × | • | • | × | • | • | • | •  | unclear reflexivity in research design, unclear research design justification |
| Sowerbutts 2020b | • | • | • | • | • | ? | • | • | • | •  | unclear reflexivity in research design,                                       |
| Singh curry 2019 | • | • | • | • | • | × | • | • | • | •  | unclear reflexivity in research design,                                       |

**ROB 2: A REVISED COCHRANE RISK-OF-BIAS TOOL FOR RANDOMIZED TRIALS**

| <b>Oh 2014</b>                                                            |                           |                                                                                                                                                               |
|---------------------------------------------------------------------------|---------------------------|---------------------------------------------------------------------------------------------------------------------------------------------------------------|
| <b>Bias</b>                                                               | <b>Authors' judgement</b> | <b>Support of judgement</b>                                                                                                                                   |
| Random sequence generation (selection bias)                               | Low risk                  | Permuted-block randomization                                                                                                                                  |
| Allocation concealment (selection bias)                                   | Low risk                  | Allocated group was announced to investigators at the time of assignment of each patient by telephone call                                                    |
| Blinding of participants and personnel (performance bias)<br>All outcomes | Unclear risk              | Insufficient information to permit judgement                                                                                                                  |
| Blinding of outcome assessment (detection bias)<br>All outcomes           | Unclear risk              | Insufficient information to permit judgement                                                                                                                  |
| Incomplete outcome data (attrition bias)<br>All outcomes                  | High risk                 | The study was closed early because of poor patient accrual, and it was expected that the target population could not be achieved within the study time frame. |
| Selective reporting (reporting bias)                                      | Low risk                  | No evidence of selective reporting.                                                                                                                           |
| Other bias                                                                | Unclear risk              | Possible inclusion bias                                                                                                                                       |

| <b>Aramaki 2019</b>                                                       |                           |                                                       |
|---------------------------------------------------------------------------|---------------------------|-------------------------------------------------------|
| <b>Bias</b>                                                               | <b>Authors' judgement</b> | <b>Support of judgement</b>                           |
| Random sequence generation (selection bias)                               | Unclear risk              | Insufficient information to permit judgement          |
| Allocation concealment (selection bias)                                   | Unclear risk              | Insufficient information to permit judgement          |
| Blinding of participants and personnel (performance bias)<br>All outcomes | Unclear risk              | Open -but assessor(s) are blinded                     |
| Blinding of outcome assessment (detection bias)<br>All outcomes           | Unclear risk              | Insufficient information to permit judgement          |
| Incomplete outcome data (attrition bias)<br>All outcomes                  | Low risk                  | No missing outcome data                               |
| Selective reporting (reporting bias)                                      | Unclear risk              | Insufficient information to permit judgement          |
| Other bias                                                                | Low risk                  | The study appears to be free of other sources of bias |
