# Supplementary material
Source: HighWire-hosted journal article supplement (https://spcare.bmj.com/content/13/e3/e515)
Supplement: inline-supplementary-material-3 [file inline-supplementary-material-3.pdf]

## Characteristics of Included Studies

| Author, Year, Study Design and Location              | Study Aim                                                                                                                                              | Sample Size, Age, Sex and % with MBO                                         | Cancer Diagnosis and Treatment                                                                                                                                                             | Definition of survival             | Survival                                                                                                                                               | HRQoL                                                                                     |
|------------------------------------------------------|--------------------------------------------------------------------------------------------------------------------------------------------------------|------------------------------------------------------------------------------|--------------------------------------------------------------------------------------------------------------------------------------------------------------------------------------------|------------------------------------|--------------------------------------------------------------------------------------------------------------------------------------------------------|-------------------------------------------------------------------------------------------|
| <b>Parenteral Nutrition</b>                          |                                                                                                                                                        |                                                                              |                                                                                                                                                                                            |                                    |                                                                                                                                                        |                                                                                           |
| Abu-Rustum 1997<br>Retrospective cohort study<br>USA | To determine the efficacy of intravenous chemotherapy alone or with PN in restoring bowel function                                                     | 21<br><br>Mean 54.5 years (range 32 to 75)<br><br><i>F</i> n= 21<br><br>100% | <i>Diagnosis</i><br>Advanced ovarian cancer<br><i>Treatment</i><br>Chemotherapy with a median of three regimens prior to developing intestinal obstruction (range two to six regimens).    | From venting gastrostomy insertion | Median for those who received salvage chemotherapy was 89 days, longer than for patients who received salvage chemotherapy alone (71 days) (P =0.031). | NR                                                                                        |
| AriaGuerra 2015<br>Prospective cohort study<br>Spain | Aimed to analyse the effects of parenteral nutrition in oncologic patients with intestinal occlusion and peritoneal carcinomatosis regarding prognosis | 55<br><br>60±13 years<br>Sex- NR<br><br>100%                                 | <i>Diagnosis</i> <ul style="list-style-type: none"> <li>• Gastrointestinal tumours n= 38</li> <li>• Gynaecological tumours n= 10</li> <li>• Other n= 7</li> </ul><br><i>Treatment</i> - NR | From starting PN to death          | Median 40 days (range 2-702)                                                                                                                           | NR                                                                                        |
| August 1991<br>Retrospective cohort study<br>USA     | To review the Yale-New Haven Hospital experience with HPN in MBO                                                                                       | 18<br>median 58 years (range 33 to 79)<br><i>F</i> n= 13                     | <i>Diagnosis</i> <ul style="list-style-type: none"> <li>• Ovarian n=9</li> <li>• Colon n=4</li> <li>• Endometrium n= 1</li> </ul>                                                          | From discharge to death            | Median 53 days (range 5-208 days)                                                                                                                      | For 11 patients all agreed the HPN was beneficial or highly beneficial. In three patients |

|                                                    |                                                                                                                                                                            |                                                                              |                                                                                                                                                                                                                                                                                                                                                                                                               |                           |                              |                                                                                                                                                     |
|----------------------------------------------------|----------------------------------------------------------------------------------------------------------------------------------------------------------------------------|------------------------------------------------------------------------------|---------------------------------------------------------------------------------------------------------------------------------------------------------------------------------------------------------------------------------------------------------------------------------------------------------------------------------------------------------------------------------------------------------------|---------------------------|------------------------------|-----------------------------------------------------------------------------------------------------------------------------------------------------|
|                                                    | patients to determine the efficacy, safety, and indications for HPN in this patient population.                                                                            | <i>M</i> n= 4<br>100%                                                        | <ul style="list-style-type: none"> <li>• Appendix n= 2</li> <li>• Stomach n= 1</li> </ul> <i>Treatment-</i> NR                                                                                                                                                                                                                                                                                                |                           |                              | the therapy was not beneficial.                                                                                                                     |
| Bond 2019<br>Retrospective cohort study<br>UK      | To assess the impact of a novel remote discharge pathway for palliative HPN patients                                                                                       | 82<br>Mean 57 (range 24–80)<br><i>F</i> n= 66<br><i>M</i> n= 16<br>100%      | <i>Diagnosis</i> <ul style="list-style-type: none"> <li>• Ovarian n= 41</li> <li>• Peritoneal n= 7</li> <li>• Colorectal n= 7</li> <li>• Gastric n= 5</li> <li>• Lymphoma n= 2</li> <li>• Neuroendocrine tumour n= 4</li> <li>• Pseudomyxoma n= 4</li> <li>• Breast n= 3</li> <li>• Endometrial n= 3</li> <li>• Bladder n= 3</li> <li>• Unknown n= 2</li> <li>• Sarcoma n= 1</li> </ul> <i>Treatments-</i> NR | From discharge to death   | Mean 134.8 days(1–1715 days) | NR                                                                                                                                                  |
| Bozzetti 2002<br>Prospective cohort study<br>Italy | To investigate changes in the quality of life in cancer patients during HPN and to determine whether it is possible to predict length of survival before administering HPN | 69<br>Mean 54 years (range 29–82)<br><i>F</i> n= 28<br><i>M</i> n= 41<br>84% | <i>Diagnosis</i> <ul style="list-style-type: none"> <li>• Colorectal n= 21</li> <li>• Stomach n= 16</li> <li>• Uterus/ovary n= 13</li> <li>• Breast n= 2</li> <li>• Other n= 17</li> </ul> <i>Treatment-</i> NR                                                                                                                                                                                               | From starting PN to death | Median 4 months (range 1–14) | Rotterdam symptom checklist (RSCL)- regards to physical, psychological and activity assessment, roughly half patients deteriorated and 40% improved |

|                                                 |                                                                                                                                                                                                                                                                                |                                                                       |                                                                                                                                                                                                             |                            |                                                                                                                                                                                                                                    |                                                                                                                                                                                                                                         |
|-------------------------------------------------|--------------------------------------------------------------------------------------------------------------------------------------------------------------------------------------------------------------------------------------------------------------------------------|-----------------------------------------------------------------------|-------------------------------------------------------------------------------------------------------------------------------------------------------------------------------------------------------------|----------------------------|------------------------------------------------------------------------------------------------------------------------------------------------------------------------------------------------------------------------------------|-----------------------------------------------------------------------------------------------------------------------------------------------------------------------------------------------------------------------------------------|
|                                                 |                                                                                                                                                                                                                                                                                |                                                                       |                                                                                                                                                                                                             |                            |                                                                                                                                                                                                                                    | with a small percentage of patients who showed no change. In contrast, only one-fourth of patients showed a worsening of the well-being assessment. The median changes were not significantly different from 0 for all the assessments. |
| Brard 2006<br>Retrospective cohort study<br>USA | The goal of this retrospective cohort study was to investigate the role of TPN in terminally ill epithelial ovarian cancer patients with terminal intestinal obstruction (TIO) and its effects on survival after TIO diagnosis and any potential complications of this therapy | 55<br><br>Mean 56.4 years (SD 11.7)<br><br><i>F</i> n= 55<br><br>100% | <i>Diagnosis</i><br><br>Patients with stage IIIC/IV epithelial ovarian cancer<br><br><i>Treatment</i><br><br>All patients were previously treated with paclitaxel/platinum following cytoreductive surgery. | From time of MBO diagnosis | Patients survived a median of 72 days (range 16–485) if they received TPN compared to 41 days (range 4–133) if no TPN was administered. The mortality rate ratio for TPN users compared to non-users was 0.59 (95% CI: 0.35–1.00). | NR                                                                                                                                                                                                                                      |

|                                                           |                                                                                                                                                                                 |                                                                                     |                                                                                                                                                                                                                                                                                                     |                                                                                             |                                                                                                                                                                                                                                                                                                                                            |                                   |
|-----------------------------------------------------------|---------------------------------------------------------------------------------------------------------------------------------------------------------------------------------|-------------------------------------------------------------------------------------|-----------------------------------------------------------------------------------------------------------------------------------------------------------------------------------------------------------------------------------------------------------------------------------------------------|---------------------------------------------------------------------------------------------|--------------------------------------------------------------------------------------------------------------------------------------------------------------------------------------------------------------------------------------------------------------------------------------------------------------------------------------------|-----------------------------------|
| Chermesh<br>2011<br>Prospective<br>cohort study<br>Israel | To define the role of PN in patients with MBO                                                                                                                                   | 28<br><br>Mean 59.9<br>± 12.7 years<br><br>F n= 13<br>M n=15<br><br>82%             | Diagnosis <ul style="list-style-type: none"> <li>• Ovary n= 9</li> <li>• Stomach n= 8</li> <li>• Colon n= 4</li> <li>• Pancreas n= 3</li> <li>• Breast n= 2</li> <li>• Squamous cell carcinoma of the larynx presumed n= 1</li> <li>• Carcinoid presumed n= 1</li> </ul>                            | Not defined                                                                                 | Median 140 days (range 20–783) with no difference with regard to age, gender, primary diagnosis, BMI, percentage of weight loss, albumin level and occurrence of TPN-related complications.<br><br>Patients with KPS > 50 had significantly longer survival than patients with KPS < 50 62 days (range 20–141) vs 211 days (range 50–783). | NR                                |
| Chouhan<br>2016<br>Retrospective<br>cohort study<br>USA   | To examine a large, single-institution dataset to describe outcomes associated with concurrent TPN and systemic chemotherapy for persistent MSBO after conservative management. | 82<br><br>Median 55<br>years (range<br>17–85)<br><br>F n= 51<br>M n= 31<br><br>100% | Diagnosis <ul style="list-style-type: none"> <li>• Gastrointestinal n= 49</li> <li>• Gynecological n= 18</li> <li>• Other n= 15</li> </ul> Treatment<br><br>Chemotherapy<br>1st line 38 (46.3%)<br>2nd line 15 (18.3%)<br>≥3rd line 29 (35.3%)<br><br>New chemotherapy start during TPN- 58 (70.7%) | From the initial date where TPN supplementation and chemotherapeutic intervention coincided | Median survival 3.1 months (range, 0.03–69.4 months), with a 1-year overall rate of 12.2%. The median duration of TPN was 45 days (range, 9–639)                                                                                                                                                                                           | NR                                |
| Cotogni<br>2017                                           | To analyse the quality of life in advanced cancer                                                                                                                               | 111                                                                                 | Diagnosis <ul style="list-style-type: none"> <li>• Stomach n= 38</li> </ul>                                                                                                                                                                                                                         | From discharge                                                                              | Median 4.7 months, (range 1–42)                                                                                                                                                                                                                                                                                                            | Patients with advanced malignancy |

|                                                       |                                                                                                                                                                                                                       |                                                                                      |                                                                                                                                                                                                                                                                                                                   |                           |                               |                                                                                                                                                                                                                                                                                                               |
|-------------------------------------------------------|-----------------------------------------------------------------------------------------------------------------------------------------------------------------------------------------------------------------------|--------------------------------------------------------------------------------------|-------------------------------------------------------------------------------------------------------------------------------------------------------------------------------------------------------------------------------------------------------------------------------------------------------------------|---------------------------|-------------------------------|---------------------------------------------------------------------------------------------------------------------------------------------------------------------------------------------------------------------------------------------------------------------------------------------------------------|
| Prospective cohort study<br>Italy                     | patients on HPN, and to investigate whether the combination with oncologic treatments correlates with changes in quality of life.                                                                                     | Median 62 years (range 32 to 79)<br><br><i>F</i> n= 54<br><i>M</i> n= 57<br><br>90%  | <ul style="list-style-type: none"> <li>• Colon/rectum n= 21</li> <li>• Pancreas/biliary system n= 20</li> <li>• Oesophagus n= 10</li> <li>• Lung n= 10</li> <li>• Ovary n= 2</li> <li>• Others n= 10</li> </ul> <p><i>Treatment</i></p> <p>Chemotherapy n= 61 Radiation therapy n= 2<br/>Both treatments n= 9</p> | with HPN to death         |                               | requiring a nutritional supplementation through HPN maintained their QoL or even showed an improvement in some scores according to the EORTC QLQ-C30. The items which significantly improved were the domains of global QoL, physical, role, and emotional functioning, as well as appetite loss and fatigue. |
| Deurksen 2004<br>Retrospective cohort study<br>Canada | The objective of this study was to determine whether a subgroup of patients with intestinal obstruction would benefit from support with TPN, identify factors that might predict patients who would benefit from home | 9<br><br>Mean- 45 (range 35 to 57)<br><br><i>F</i> n= 3<br><i>M</i> n= 6<br><br>100% | <p><i>Diagnosis</i></p> <ul style="list-style-type: none"> <li>• Gastric n= 4</li> <li>• Colon n= 4</li> <li>• Cholangiocarcinoma n= 1</li> </ul> <p><i>Treatment-</i> NR</p>                                                                                                                                     | From starting PN to death | Median 84 (range 26 to 433 d) | NR                                                                                                                                                                                                                                                                                                            |

|                                                            |                                                                                                                                                                                          |                                                                                  |                                                                                                                                                                                                                                                                                                                                                                                |                                    |                                                                                                                                                                                                                                                                                      |    |
|------------------------------------------------------------|------------------------------------------------------------------------------------------------------------------------------------------------------------------------------------------|----------------------------------------------------------------------------------|--------------------------------------------------------------------------------------------------------------------------------------------------------------------------------------------------------------------------------------------------------------------------------------------------------------------------------------------------------------------------------|------------------------------------|--------------------------------------------------------------------------------------------------------------------------------------------------------------------------------------------------------------------------------------------------------------------------------------|----|
|                                                            | TPN and identify issues relevant for prospective study.                                                                                                                                  |                                                                                  |                                                                                                                                                                                                                                                                                                                                                                                |                                    |                                                                                                                                                                                                                                                                                      |    |
| Dzierianowski 2021<br>Retrospective cohort study<br>Poland | To verify the overall survival and impact of the overall performance status, clinical symptoms, and laboratory test results at HPN initiation on patients' survival probability with MBO | 114<br><br>Mean (95% CI)- 54.7 (52.5–56.9)<br><br>F n= 81<br>M n= 33<br><br>100% | <i>Diagnosis</i><br><br><ul style="list-style-type: none"> <li>• Colorectal n= 19</li> <li>• Stomach n= 40</li> <li>• Other gastroenterological n= 7</li> <li>• Gynecological n= 33</li> <li>• Ovarian n= 25</li> <li>• Other gynecological n= 8</li> <li>• Other n= 15</li> </ul><br><i>Treatment-</i> NR                                                                     | From starting PN to death          | Median (Q25–Q75) 89 (52–186) (range, 16–1393)<br><br>Survival based on ECOG<br><ul style="list-style-type: none"> <li>• 0 Median 680 (range 543–1393)</li> <li>• 1 Median 174 (range 65–748)</li> <li>• 2 Median 61.5 (range 25–399)</li> <li>• 3 Median 26 (range 16–64)</li> </ul> | NR |
| Fan 2007<br>Retrospective cohort study<br>China            | The purpose of the study was to explore life expectancy in the patient with advanced cancer who received PN after cessation of energy intake due to malignant GI tract obstruction.      | 115<br><br>Mean- 51 (range, 31–74)<br>F n= 62<br>M n= 53<br><br>100%             | <i>Diagnosis</i><br><br><ul style="list-style-type: none"> <li>• Gastric carcinoma n= 24</li> <li>• Colorectal carcinoma n= 23</li> <li>• Oesophageal carcinoma n= 20</li> <li>• Jejunal carcinoma n= 14</li> <li>• Breast carcinoma n= 10</li> <li>• Sarcoma n= 9</li> <li>• Cholangiocarcinoma n= 9</li> <li>• Pancreatic carcinoma n= 3</li> <li>• Lymphoma n= 3</li> </ul> | From the initiation of PN to death | Mean 6.5 months<br><br>Eleven patients survived $\geq 1$ year and 2 patients have been alive for almost 4 years later after cessation of energy intake.                                                                                                                              | NR |

|                                                      |                                                                                                                                                                                                                                                                                                                                                                                              |                                                                            | <i>Treatment- NR</i>                                                                                                                                                                                                                                                                                                                                                                                                                                                                                                                                   |                                                      |                                                                                                      |                                                         |
|------------------------------------------------------|----------------------------------------------------------------------------------------------------------------------------------------------------------------------------------------------------------------------------------------------------------------------------------------------------------------------------------------------------------------------------------------------|----------------------------------------------------------------------------|--------------------------------------------------------------------------------------------------------------------------------------------------------------------------------------------------------------------------------------------------------------------------------------------------------------------------------------------------------------------------------------------------------------------------------------------------------------------------------------------------------------------------------------------------------|------------------------------------------------------|------------------------------------------------------------------------------------------------------|---------------------------------------------------------|
| Keane<br>2018<br>Retrospective<br>cohort study<br>UK | To examine the prognostic significance of performance status, type and site of tumour, previous or concurrent chemo-radiotherapy, anthropometric characteristics, nutritional and inflammatory status, demographic characteristics, serum biochemistry, and prognostic indices based on a large cohort of patients with advanced cancer receiving HPN at University College London Hospitals | 107<br><br>Mean age<br>57 ± 12<br>years<br>F n= 68<br>M n= 39<br><br>74.3% | <i>Diagnosis</i> <ul style="list-style-type: none"> <li>• Gynaecological n= 37</li> <li>• Upper Gastrointestinal n= 21</li> <li>• Lower Gastrointestinal n= 24</li> <li>• Hepato-pancreatobiliary n= 10</li> <li>• Haematological n= 5</li> <li>• Other n= 10</li> </ul> <p>Most patients had metastatic disease (81.3%)</p> <p><i>Treatments</i></p> <p>Most patients had undergone surgery for their malignancy (79%), or chemotherapy before and/or during PN administration (90.4%). The majority of patients were radiotherapy naive (71.2%).</p> | Measured from discharge until death                  | Overall mean survival was 30.8 weeks (95% CI 21.4–39.6) and median survival was 14 weeks (IQR 5–34). | NR                                                      |
| King<br>1993<br>Retrospective<br>cohort study<br>USA | 1) Review our experience of in gynaecological cancer patients who received HPN.<br>2) determine if                                                                                                                                                                                                                                                                                           | 61<br><br>Age- mean<br>55.0 years.<br>F n= 61                              | <i>Diagnosis</i> <ul style="list-style-type: none"> <li>• Ovarian n= 34</li> <li>• Cervix n= 15</li> <li>• Corpus n= 9</li> <li>• Vulva n= 2</li> <li>• Vagina n= 1</li> </ul>                                                                                                                                                                                                                                                                                                                                                                         | Date of initiation of HPN to last follow-up or death | Mean 167.5 days, median 60 days (range 2-780 days)                                                   | Prior to HPN starting versus during HPN<br>KPS 48<br>47 |

|                                                  |                                                                          |                                                                 |                                                                                                                                                                                                                                                                                                                                                               |                                    |                                   |                                                                                                                                                                                                                                                                                                          |
|--------------------------------------------------|--------------------------------------------------------------------------|-----------------------------------------------------------------|---------------------------------------------------------------------------------------------------------------------------------------------------------------------------------------------------------------------------------------------------------------------------------------------------------------------------------------------------------------|------------------------------------|-----------------------------------|----------------------------------------------------------------------------------------------------------------------------------------------------------------------------------------------------------------------------------------------------------------------------------------------------------|
|                                                  | HPN improved patients nutrition parameters, survival and quality of life | 72%                                                             | <p><i>Treatment</i><br/>Surgery n= 60<br/>Chemotherapy n= 56<br/>Radiotherapy n= 43<br/>30 patients had been treated with all three modalities, and 27 had been treated with two modalities.</p> <p><i>Treatment received during HPN</i><br/>Surgery n= 14<br/>Chemotherapy n= 31<br/>Radiotherapy n= 7<br/>*Doesn't state surgery for resolution of MBO.</p> |                                    |                                   | <p>Activity level<br/>3.8<br/>Pain 3.5<br/>2.6<br/>2.3<br/>GI discomfort<br/>2.8<br/>2.4<br/>N &amp; V 3.2<br/>2.7<br/>Fatigue 3.4<br/>3.0<br/>Diarrhoea<br/>2.0<br/>1.8<br/>Morale 2.7<br/>2.5<br/>Social interaction family/friends<br/>2.8<br/>2.5<br/>Note, 1, usual or best; 5, worst or never.</p> |
| Mercadante 1995 Retrospective cohort study Italy | To describe clinical experience with HPN patients                        | 13<br>Age- mean 56 years (32 to 71)<br>F n= 8<br>M n= 5<br>100% | <p><i>Diagnosis</i></p> <ul style="list-style-type: none"> <li>• Pharynx n= 1</li> <li>• Colon n= 4</li> <li>• Stomach n= 1</li> <li>• Breast n 1</li> <li>• Ileum n 2</li> <li>• Ovary n 2</li> <li>• Oesophagus n= 1</li> <li>• Pancreas n= 1</li> </ul>                                                                                                    | From the initiation of PN to death | Mean 30.4 days (range 3-121 days) | NR                                                                                                                                                                                                                                                                                                       |



|                                                          |                                                                                                                                                                                                                                |                                                                                                 |                                                                                                                                                                                                                                                                                                                                                                                          |                                                                                               |                                                                                                                                                                                                        |    |
|----------------------------------------------------------|--------------------------------------------------------------------------------------------------------------------------------------------------------------------------------------------------------------------------------|-------------------------------------------------------------------------------------------------|------------------------------------------------------------------------------------------------------------------------------------------------------------------------------------------------------------------------------------------------------------------------------------------------------------------------------------------------------------------------------------------|-----------------------------------------------------------------------------------------------|--------------------------------------------------------------------------------------------------------------------------------------------------------------------------------------------------------|----|
|                                                          |                                                                                                                                                                                                                                |                                                                                                 | <i>Treatments- NR</i>                                                                                                                                                                                                                                                                                                                                                                    |                                                                                               |                                                                                                                                                                                                        |    |
| Oh<br>2014<br>Randomised<br>control trial<br>South Korea | To investigate the effect of PN on prolonging survival at the end of life in patients with terminal cancer                                                                                                                     | 16<br><br>Age (years)<br>60.4 ± 12.6<br><i>F</i> n= 6<br><i>M</i> n= 10<br><br>100%             | <i>Diagnosis</i><br><br><ul style="list-style-type: none"> <li>• Hepatobiliary and pancreas n= 2</li> <li>• Colon n= 4</li> <li>• Stomach n= 4</li> <li>• Breast n= 1</li> <li>• Neuroendocrine n= 2</li> <li>• Lung n= 1</li> <li>• Prostate n= 1</li> <li>• Salivary gland n= 1</li> </ul><br><i>Treatments- NR</i>                                                                    | Survival was defined as the time from randomisation to death or to withdrawal from the study. | Median survival of the PN group was 13 days (95% CI, 3.1–22.9 days)<br>median survival of the control group was 8 days (95% CI, 5.7–10.3 days)                                                         | NR |
| Patel<br>2021<br>Retrospective<br>cohort study<br>UK     | To examine i) what characterizes the MBO population, ii) what medical and nutritional care do patients with MBO who are referred or not referred for nutrition receive and iii) if any of these care pathways affect survival. | 72<br><br>mean (SD)<br>63.1 (13.1)<br>years<br><br><i>F</i> n= 57<br><i>M</i> n= 15<br><br>100% | <i>Diagnosis</i><br><br><ul style="list-style-type: none"> <li>• Gynaecology n = 36</li> <li>• Lower GI n= 19</li> <li>• Upper GI n= 3</li> <li>• HPB n= 3</li> <li>• Urology n= 2</li> <li>• Haematology n= 1</li> <li>• Breast n= 1</li> <li>• Other n= 6</li> </ul><br><i>Treatment</i><br><br>Prior surgery for cancer n= 32<br>Prior radiotherapy n= 17<br>Prior chemotherapy n= 52 | From admission with MBO to death or censorship                                                | Median (range) 20 (5.9–65.1) weeks (4.7 (1.4–15.2) months. There was a survival advantage in those in the HPN group vs. those who may have required PN group (323 vs. 91 day, respectively P= 0.0021). | NR |
| Ruggeri<br>2020<br>Retrospective<br>cohort study         | To describe the selection criteria used for identifying the eligible patients                                                                                                                                                  | 629<br><br>mean ± SD<br>64.2 ± 12.6                                                             | <i>Diagnosis</i><br><br><ul style="list-style-type: none"> <li>• Gastrointestinal tract n= 319</li> </ul>                                                                                                                                                                                                                                                                                | Date of initiation of HPN to last                                                             | Survival (weeks) (n= 564) - Mean (SD) 16.1 (18.0), median (95% C.I.) (9.0-11.3)                                                                                                                        | NR |

|                                                       |                                                                                                                                                                             |                                                                                                                                       |                                                                                                                                                                                                                                                                                                                                                                                                                                                                                                                                                     |                                    |                                                                                                                                                                                                                            |    |
|-------------------------------------------------------|-----------------------------------------------------------------------------------------------------------------------------------------------------------------------------|---------------------------------------------------------------------------------------------------------------------------------------|-----------------------------------------------------------------------------------------------------------------------------------------------------------------------------------------------------------------------------------------------------------------------------------------------------------------------------------------------------------------------------------------------------------------------------------------------------------------------------------------------------------------------------------------------------|------------------------------------|----------------------------------------------------------------------------------------------------------------------------------------------------------------------------------------------------------------------------|----|
| Italy                                                 | for home artificial nutrition (HAN), and to evaluate the impact of HAN on performance status and survival in cancer patients assisted at home by a palliative care program. | <i>F</i> n= 305<br><i>M</i> n= 324<br><br>77.8%                                                                                       | <ul style="list-style-type: none"> <li>• Head-neck n= 104</li> <li>• Other organs n= 114</li> <li>• Lung n= 20</li> </ul> <p><i>Treatments-</i> NR</p>                                                                                                                                                                                                                                                                                                                                                                                              | follow-up or death                 | KPS at the entry was significantly associated with estimated survival time: a higher KPS at the start of HAN predicted a longer survival [odds ratio 1/4 0.9, <i>p</i> < .001,] HPN not separated out from HAN as a whole. |    |
| Santarpia 2006<br>Retrospective cohort study<br>Italy | To identify predictors of survival in patients with carcinomatosis on home parenteral nutrition                                                                             | 152<br><br>Mean 57.8 +/- 13.6 years.<br>Median 59.5 years (Range: 22.0 - 88.0 years)<br><i>F</i> n= 107<br><i>M</i> n= 45<br><br>100% | <p><i>Diagnosis</i></p> <ul style="list-style-type: none"> <li>• Stomach n=48</li> <li>• Ovarian n= 42</li> <li>• Colorectal n = 30</li> <li>• Endometrium n = 7</li> <li>• Breast n = 6</li> <li>• Iluem n = 5</li> <li>• Gallbladder n = 4</li> <li>• Pancreas n = 3</li> <li>• Kidney n = 2</li> <li>• Skin n = 1</li> <li>• Prostate n = 1</li> <li>• Abdominal sarcoma n = 1</li> <li>• Unknown n = 2</li> </ul> <p><i>Treatments-</i> "These patients were considered terminal because they were unresponsive to any oncologic treatment"</p> | Date of initiation of HPN to death | Median 45 days (range, 6–1269).                                                                                                                                                                                            | NR |
| Soo 2018                                              | To describe the patient-related                                                                                                                                             | 38                                                                                                                                    | <i>Diagnosis</i>                                                                                                                                                                                                                                                                                                                                                                                                                                                                                                                                    | Not specified                      | Mean survival 5.4 months (range 0.25–33).                                                                                                                                                                                  | NR |

|                                              |                                                                                                                                                                                                         |                                                                                                           |                                                                                                                                                                                                                                                                                                                                                                                                                                                                    |                         |                                                                                                                                                                                                                                                                               |                        |
|----------------------------------------------|---------------------------------------------------------------------------------------------------------------------------------------------------------------------------------------------------------|-----------------------------------------------------------------------------------------------------------|--------------------------------------------------------------------------------------------------------------------------------------------------------------------------------------------------------------------------------------------------------------------------------------------------------------------------------------------------------------------------------------------------------------------------------------------------------------------|-------------------------|-------------------------------------------------------------------------------------------------------------------------------------------------------------------------------------------------------------------------------------------------------------------------------|------------------------|
| Retrospective cohort study<br>Canada         | variables in a cohort of advanced cancer patients (ACPs) enrolled in a HPN program                                                                                                                      | 48.76 years (SD 13.8)<br><i>F</i> n= 27<br><i>M</i> n= 11<br><br>84.2%)                                   | <ul style="list-style-type: none"> <li>• Ovarian n=13</li> <li>• Colonic n=6</li> <li>• Gastric n=6</li> <li>• Peritoneal n=3</li> <li>• Unknown n=2</li> <li>• Oesophageal n=2</li> <li>• Carcinoid n=1</li> <li>• Cervical n=</li> <li>• Ampullary n=1</li> <li>• GIST n=1</li> <li>• Anaplastic large-cell lymphoma n=1</li> <li>• Rectal n=1</li> </ul> <p><i>Treatment</i></p> <p>Chemotherapy n=14<br/>Chemotherapy and radiotherapy n=1<br/>None n = 23</p> |                         | Start of HPN KPS > 50 (median 70, IQR 68.75 - 81.86), had a 6-month median duration of life (IQR 2.75 - 9.5). Start of HPN KPS <50 (median 50, IQR 45 - 50), had a median survival of 3 months (IQR 1.75-3.5), p=0.02; two-tailed.                                            |                        |
| Sowerbutts 2019<br>Mixed-methods study<br>UK | To investigate the experience of HPN for women with ovarian cancer and MBO and their family members acting as caregivers, in the context of the nutritional status and survival of a cohort of patients | 38<br><br>Age, mean ± SD-<br>Interviewed 67 (7.5), not interviewed 64 (10.1)<br><i>F</i> n=38<br><br>100% | <i>Diagnosis</i><br><br>All patients diagnosed with ovarian cancer.<br><br><i>Treatment</i> - NR                                                                                                                                                                                                                                                                                                                                                                   | From admission with MBO | Median for all 38 women was 70 days (range 8 to 506).<br>Median for 32 women who received PN was 81 days (range 10 to 506).<br>Median for the 17 patients who had HPN was 156 days (range 46–506).<br>Median for 6 women who did not receive PN was 20 days (range 8 to 109). | Qualitative synthesis. |

|  |                              |  |  |  |  |  |
|--|------------------------------|--|--|--|--|--|
|  | with ovarian cancer and MBO. |  |  |  |  |  |
|--|------------------------------|--|--|--|--|--|

| Author, Year, Study Design and Location           | Study Aim                                                                                                                                                      | Sample Size, Age, Sex and % with MBO                                                                  | Cancer Diagnosis, Treatment                                                                                                                                                                                                                                                                                                                                                                                                                                                                                                       | Definition of survival     | Survival                                                | Symptoms                       | HRQoL                                                                                                                                                                                         |
|---------------------------------------------------|----------------------------------------------------------------------------------------------------------------------------------------------------------------|-------------------------------------------------------------------------------------------------------|-----------------------------------------------------------------------------------------------------------------------------------------------------------------------------------------------------------------------------------------------------------------------------------------------------------------------------------------------------------------------------------------------------------------------------------------------------------------------------------------------------------------------------------|----------------------------|---------------------------------------------------------|--------------------------------|-----------------------------------------------------------------------------------------------------------------------------------------------------------------------------------------------|
| <b><i>Palliative Venting Gastrostomy</i></b>      |                                                                                                                                                                |                                                                                                       |                                                                                                                                                                                                                                                                                                                                                                                                                                                                                                                                   |                            |                                                         |                                |                                                                                                                                                                                               |
| Aramaki 2019<br>Randomised control trial<br>Japan | To evaluate the superiority of PTEG over NGT as palliative care for bowel obstruction in patients with terminal malignancy from the perspective of patient QOL | 40 (21 PEG, 19 NGT)<br><br>Mean 59.3,<br>Median 32<br>(Range 34-76)<br>F n= 14<br>M n= 25<br><br>100% | <i>Diagnosis</i><br><br>21 PTEG group <ul style="list-style-type: none"> <li>• Colorectal n= 10</li> <li>• Stomach n= 6</li> <li>• Ovarian n= 2</li> <li>• Bile duct n= 2</li> <li>• Pancreatic n= 1</li> </ul> 19 NGT group <ul style="list-style-type: none"> <li>• Stomach n =6</li> <li>• Colorectal n= 3</li> <li>• Pancreatic n= 3</li> <li>• Ovarian n= 3</li> <li>• Peritoneal mesothelioma n= 2</li> <li>• Oesophageal n= 1</li> <li>• Bile duct n= 1</li> <li>• Unknown primary n= 1</li> </ul><br><i>Treatment- NR</i> | From gastrostomy placement | 50 days for the PEG group and 86 days for the NGT group | Included in HRQoL              | Mean EQ-5D scores for the PTEG and NGT groups were 7.132 (4.543–9.702) and 3.663 (0.464–6.862), respectively. Mean SF-8 scores were 420.1 (282.6–557.6) and 199.4 (22.2–376.6), respectively. |
| Adelson 1993                                      | Evaluate the effectiveness of a percutaneous                                                                                                                   | 13                                                                                                    | Diagnosis <ul style="list-style-type: none"> <li>• Ovarian n= 9</li> </ul>                                                                                                                                                                                                                                                                                                                                                                                                                                                        | Length of tube placement   | median 62 days (range 5-246) one                        | All gastrostomy tubes provided | NR                                                                                                                                                                                            |

|                                                         |                                                                                                                                                                                                           |                                                                                         |                                                                                                                                                                                                                                                                                                                                    |                            |                                                          |                                                                                                         |                                                                                                                                                    |
|---------------------------------------------------------|-----------------------------------------------------------------------------------------------------------------------------------------------------------------------------------------------------------|-----------------------------------------------------------------------------------------|------------------------------------------------------------------------------------------------------------------------------------------------------------------------------------------------------------------------------------------------------------------------------------------------------------------------------------|----------------------------|----------------------------------------------------------|---------------------------------------------------------------------------------------------------------|----------------------------------------------------------------------------------------------------------------------------------------------------|
| Retrospective cohort study USA                          | technique for placement of a drainage gastrostomy.                                                                                                                                                        | Median-61 (range 42-78)<br>F n= 13<br><br>100%                                          | <ul style="list-style-type: none"> <li>• Cervical n =2</li> <li>• Papillary peritonela serous tumour n= 1</li> <li>• Breast n= 1</li> </ul> <p><i>Treatment</i></p> <p>Prior laparotomies median two (range 1-4)</p>                                                                                                               |                            | tube removed electively 131 days after resolution of SBO | GI driainage and relief of n&v and abdo pain due to distention.                                         |                                                                                                                                                    |
| Arvieux 2005<br>Prospective cohort study France         | To draw up a specific medicosurgical protocol for immediate response to the start of bowel obstruction in cancer patients with end-stage peritoneal carcinomatosis who cannot receive curative treatment. | 10<br><br>Mean 57.9 years (median at 62.5, range 22–84)<br>F n= 8<br>M n= 2<br><br>100% | <p><i>Diagnosis</i></p> <ul style="list-style-type: none"> <li>• Ovarian n= 6</li> <li>• Pancreas n=1</li> <li>• Stomach n=1</li> <li>• Bladder n=1</li> <li>• Melanoma n=1</li> </ul> <p>*all causing carcinamatosi.</p>                                                                                                          | From gastrostomy placement | median 13 days (range 6 to 125 days)                     | 100% relief of symptoms                                                                                 | NR                                                                                                                                                 |
| Brooksbank 2002<br>Retrospective cohort study Australia | An update of our preliminary experience with palliative venting gastrostomy (PVG), which was first reported in 1991                                                                                       | 51<br><br>61 years (range 25±86 years)<br>F n= 32<br>M = n 19                           | <p><i>Diagnosis</i></p> <ul style="list-style-type: none"> <li>• Colon and rectum n= 27</li> <li>• Ovary n= 16</li> <li>• Breast n= 2</li> <li>• Pancreas n= 2</li> <li>• Other n= 4</li> </ul> <p><i>Treatment</i></p> <p>All had previous surgery. All patients had been treated with various first-line anti-emetic agents,</p> | From gastrostomy placement | median survival 17 days (range 1±190)                    | For 47/51 (92%) patients, the symptoms of nausea and vomiting were substantially or completely relieved | Many patients were also able to resume some degree of oral intake of soft food and drink. This was usually seen by both patients and families as a |

|                                                          |                                                                                                                                                                                                                                                          |                                                             |                                                                                                                                                                                                                                                                                                         |                            |                                |                                                                                                             |                   |
|----------------------------------------------------------|----------------------------------------------------------------------------------------------------------------------------------------------------------------------------------------------------------------------------------------------------------|-------------------------------------------------------------|---------------------------------------------------------------------------------------------------------------------------------------------------------------------------------------------------------------------------------------------------------------------------------------------------------|----------------------------|--------------------------------|-------------------------------------------------------------------------------------------------------------|-------------------|
|                                                          |                                                                                                                                                                                                                                                          |                                                             | mainly metoclopramide, haloperidol and prochlorperazine, alone or in combination. Dexamethasone was used in six patients. Octreotide was used in three patients.                                                                                                                                        |                            |                                |                                                                                                             | positive outcome. |
| Cannizzaro 1995<br>Prospective cohort study<br>Italy     | To assess their experience in performing endoscopic gastrostomy in patients with obstructing disseminated abdominal cancers, also compared the efficacy of two catheters of different sizes, 15 and 20 Fr respectively, in obtaining symptomatic relief. | 22<br><br>Mean 53.7<br>(range 29-73)<br>F n= 22<br><br>100% | <i>Diagnosis</i> <ul style="list-style-type: none"> <li>• Ovarian n= 14</li> <li>• Endometrial n =5</li> <li>• Colon n= 3</li> </ul><br><i>Treatment</i><br><br>Previous abdominal surgery reported for all participants.                                                                               | From gastrostomy placement | Mean 74 days<br>(Range 13-272) | 100% of patient had reduced symptoms. 100% of patients tolerated soft and liquid foods after PEG placement. | NR                |
| Champagnutta 1998<br>Retrospective cohort study<br>Italy |                                                                                                                                                                                                                                                          | 64<br><br>56 (range 20- 76) years<br>F n= 56<br><br>100%    | <i>Diagnosis</i> <ul style="list-style-type: none"> <li>• Colon n= 9</li> <li>• Stomach n = 2</li> <li>• Gallbladder n= 2</li> <li>• Breast n= 1</li> <li>• Ovarian n =41</li> <li>• Vagina n= 3</li> <li>• Endometrium n= 3</li> <li>• Gynaecological sarcoma n = 3</li> </ul><br><i>Treatment- NR</i> | From gastrostomy placement | Median 57 days (range 4-472)   | In 49/64 (76.5%) symptomatic well-being was obtained after a few days of PEG                                | NR                |

|                                                      |                                                                                                                                                                                                                          |                                                             |                                                                                                                                                                                                                                                                                                                                                                                                                                                                                                                                                                                                                                                                              |                            |                                                                                                               |                                                                                                                                      |    |
|------------------------------------------------------|--------------------------------------------------------------------------------------------------------------------------------------------------------------------------------------------------------------------------|-------------------------------------------------------------|------------------------------------------------------------------------------------------------------------------------------------------------------------------------------------------------------------------------------------------------------------------------------------------------------------------------------------------------------------------------------------------------------------------------------------------------------------------------------------------------------------------------------------------------------------------------------------------------------------------------------------------------------------------------------|----------------------------|---------------------------------------------------------------------------------------------------------------|--------------------------------------------------------------------------------------------------------------------------------------|----|
| Cunningham 1995<br>Retrospective cohort study<br>USA | To evaluate the use of percutaneous decompression gastrostomy in patients with gynaecologic malignancies. Evaluated for successful gastric decompression, acute and long-term complications, and palliation of symptoms. | 20<br><br>Mean 52 (range 31-73)<br>F n= 20<br><br>100%      | <p><i>Diagnosis</i></p> <ul style="list-style-type: none"> <li>• Ovary n= 10 patients</li> <li>• Uterine corpus n= 6</li> <li>• Cervix n= 3</li> <li>• Peritoneum n= 1</li> </ul> <p>All patients had recurrent gynaecologic malignancies.</p> <p><i>Treatment</i></p> <ul style="list-style-type: none"> <li>• Three patients had undergone previous paracentesis.</li> <li>• Nineteen patients had undergone at least one prior laparotomy (mean 2.2, range 1–6).</li> <li>• Eight patients had received prior radiation therapy including whole abdominal radiation in 2 patients, extended field radiation in 4 patients, and pelvic radiation in 2 patients.</li> </ul> | Length of tube placement   | Mean 53 days (range 7-184 days) (Seventeen patients continued gastrostomy drainage until the time of death.)* | All patients had significant relief of nausea and emesis except two who had persistent nausea despite adequate gastric decompression | NR |
| Diver 2013<br>Retrospective cohort study<br>USA      | To review a single institution's experience with gastrostomy tubes (GTs) performed for malignant bowel obstruction from gynecologic cancers.                                                                             | 115<br><br>Median-57 (range 26–88)<br>F n = 115<br><br>100% | <p><i>Diagnosis</i></p> <p>Ovarian/fallopian tube/PPC n= 96</p> <p>Cervical n= 6</p> <p>Uterine (epithelial and stromal) n =13</p> <p><i>Treatment</i></p> <p>Chemotherapy (No. of lines of received prior to GT)</p> <p>1 n= 20</p> <p>2 n= 22</p>                                                                                                                                                                                                                                                                                                                                                                                                                          | From gastrostomy placement | Median 5.57 weeks (range 1 day–5.5 years)                                                                     | NR                                                                                                                                   | NR |

|                                                              |                                                                                                                                |                                                                     |                                                                                                                                                                                                                                       |                                                                             |                                                |                                                                                                                                                                                                                                                                                                                                      |    |
|--------------------------------------------------------------|--------------------------------------------------------------------------------------------------------------------------------|---------------------------------------------------------------------|---------------------------------------------------------------------------------------------------------------------------------------------------------------------------------------------------------------------------------------|-----------------------------------------------------------------------------|------------------------------------------------|--------------------------------------------------------------------------------------------------------------------------------------------------------------------------------------------------------------------------------------------------------------------------------------------------------------------------------------|----|
|                                                              |                                                                                                                                |                                                                     | 3 or more n= 67<br>• Unknown- 6                                                                                                                                                                                                       |                                                                             |                                                |                                                                                                                                                                                                                                                                                                                                      |    |
| Dittrich<br>2017<br>Retrospective<br>cohort study<br>Germany | Investigate the quantity of symptom relief realized with PEG and the corresponding complications.                              | 76<br><br>Median-66 (range 23-86)<br>F n= 53<br>M n =22<br><br>100% | <i>Diagnosis</i><br><br>•Ovarian n= 24<br>•Colorectal n= 13<br>•Pancreatic n= 12<br>•Small intestine n= 5<br>•Gallbladder/biliary tract n= 5<br>•Gastric n= 4<br>•Breast n= 3<br>•CUP n= 3<br>•Other n= 6<br><br><i>Treatment- NR</i> | From gastrostomy placement                                                  | Median 28 days (range 2–440).                  | Without a NG tube or PEG, the mean frequency of vomiting per day was 2.2. The use of a NG tube led to a reduction of daily vomiting to 0.8, and the PEG to a more decreased value of 0.4. PEG reduced the daily frequency of vomiting to 18% of the initial value and the probability to suffer from nausea to 50% (both p < 0.001). | NR |
| Gauvin<br>2021<br>Retrospective<br>cohort study<br>USA       | To better understand the risks, benefits, and practices associated with the placement and maintenance of palliative G-tubes in | 55<br><br>Mean ± SD (range), years, 59.5 ±                          | <i>Diagnosis</i><br><br>• GI, pancreas, or liver n= 24<br>• Thoracic/esophageal n= 3<br>• Gynaecologic/Genitourinary n= 26<br>• Other n= 2                                                                                            | from the date of gastrostomy placement to the date of death or last follow- | Survival %<br>30 d 54.8<br>1 y 11.4<br>3 y 9.5 | NR                                                                                                                                                                                                                                                                                                                                   | NR |



|                                                    |                                                                                                                                                        |                                                                                                 |                                                                                                                                                                                                                                                                                                                                                                                                                                                                                                                                             |                                                                     |                                        |                                                                   |    |
|----------------------------------------------------|--------------------------------------------------------------------------------------------------------------------------------------------------------|-------------------------------------------------------------------------------------------------|---------------------------------------------------------------------------------------------------------------------------------------------------------------------------------------------------------------------------------------------------------------------------------------------------------------------------------------------------------------------------------------------------------------------------------------------------------------------------------------------------------------------------------------------|---------------------------------------------------------------------|----------------------------------------|-------------------------------------------------------------------|----|
|                                                    | patients with cancer at our institution                                                                                                                | 11.3 (35–88)<br><br>100%                                                                        | <i>Treatment</i><br><br>Chemotherapy within 3 months of placement n= 16                                                                                                                                                                                                                                                                                                                                                                                                                                                                     | up visit, with patients alive at last follow-up considered censored |                                        |                                                                   |    |
| Goldberg 2021<br>Retrospective cohort study<br>USA | To describe the clinical outcomes after dPEG in patients with MBO and explore patients' understanding of their illness and expectations for the future | 125<br><br>Median 62 years (range, 33-95 years)<br><i>F</i> n= 65<br><i>M</i> n= 60<br><br>100% | <i>Diagnosis</i><br><br><ul style="list-style-type: none"> <li>• Colorectal adenocarcinoma n=41</li> <li>• Pancreas/ampullary adenocarcinoma n=30</li> <li>• Gastric/esophageal/GE junction adenocarcinoma n=22</li> <li>• Appendiceal adenocarcinoma n=15</li> <li>• Bile duct/gallbladder adenocarcinoma n=8</li> <li>• Small intestine adenocarcinoma n=4</li> <li>• Adenocarcinoma of unknown primary n=2</li> <li>• Colorectal neuroendocrine n=2</li> <li>• Pancreas/ampullary neuroendocrine n=1</li> </ul><br><i>Treatment</i> - NR | From gastrostomy placement                                          | Median 37 days (95% CI, 29 to 45 days) | NR                                                                | NR |
| Herman 1992<br>Retrospective cohort study<br>USA   | Report the use of Percutaneous endoscopic gastrostomies for decompression of the                                                                       | 50<br><br>Mean- 54 (range 20 to 79)                                                             | <i>Diagnosis</i><br><br><ul style="list-style-type: none"> <li>•Ovary- 26</li> <li>•Colon- 5</li> <li>•Stomach- 5</li> </ul>                                                                                                                                                                                                                                                                                                                                                                                                                | Length of tube placement                                            | Mean 66 days (range, 8 to 639 days)    | Only three patients (6%) continued to have recurrent nausea post- | NR |

|                                                        |                                                                                                                                       |                                                                                   |                                                                                                                                                                                                                                         |                            |                                            |                                                                                                                                                                                                                                                       |    |
|--------------------------------------------------------|---------------------------------------------------------------------------------------------------------------------------------------|-----------------------------------------------------------------------------------|-----------------------------------------------------------------------------------------------------------------------------------------------------------------------------------------------------------------------------------------|----------------------------|--------------------------------------------|-------------------------------------------------------------------------------------------------------------------------------------------------------------------------------------------------------------------------------------------------------|----|
|                                                        | obstructed gastrointestinal tract.                                                                                                    | <i>F</i> n = 42<br><i>M</i> n= 11<br><br>100%                                     | <ul style="list-style-type: none"> <li>•Pancreas- 4</li> <li>•Melanoma- 4</li> <li>•Endometrial- 4</li> <li>•Breast- 1</li> <li>•Renal- 1</li> </ul> <p><i>Treatment</i></p> <p>Non-surgical candidates and had failed chemotherapy</p> |                            |                                            | procedure that was not due to drainage tube impaction and was felt to be a result of central nervous system alteration. Following successful placement, 87% of the patients tolerated a full liquid diet and 56% were also able to ingest soft foods. |    |
| Issaka 2014<br>Retrospective cohort study<br>USA       | To determine the outcomes of VPEG placement in patients with advanced malignancy                                                      | 96<br><br>median 57 (range 21–90)<br><i>F</i> n= 57<br><i>M</i> n= 39<br><br>100% | <p><i>Diagnosis</i></p> <ul style="list-style-type: none"> <li>•Colorectal n= 26</li> <li>•Pancreas n= 18</li> <li>•Gynaecological n= 17</li> <li>•Gastric n= 6</li> <li>•Other n= 29</li> </ul> <p><i>Treatment</i>- NR</p>            | From gastrostomy placement | mean 135 ± 347.9 days (range 5–2,772 days) | Complete relief of nausea and vomiting was observed in the majority of patients (n = 81, 91.0 %)                                                                                                                                                      | NR |
| Jolicoeur 2003<br>Retrospective cohort study<br>Canada | To explore whether or not successful symptom control was achieved when using a PEG tube in patients with recurrent ovarian/peritoneal | 24<br><br>Age- NR<br><i>F</i> n= 24<br><br>100%                                   | <p><i>Diagnosis</i></p> <p>Ovarian n= 24</p> <p>*88% (n=21) also presented with a diagnosis of recurrent/progressive ovarian cancer</p>                                                                                                 | From gastrostomy placement | median 42 days (range 5 to 1226)           | At the time of discharge, 75% of patients were relieved of nausea and 88% no longer                                                                                                                                                                   | NR |

|                                              |                                                                                                                                               |                                                                             |                                                                                                                                                                                                                                                                                                                                                                                                                                                                                                                                                       |                            |                              |                                                                                                                                                                                                       |    |
|----------------------------------------------|-----------------------------------------------------------------------------------------------------------------------------------------------|-----------------------------------------------------------------------------|-------------------------------------------------------------------------------------------------------------------------------------------------------------------------------------------------------------------------------------------------------------------------------------------------------------------------------------------------------------------------------------------------------------------------------------------------------------------------------------------------------------------------------------------------------|----------------------------|------------------------------|-------------------------------------------------------------------------------------------------------------------------------------------------------------------------------------------------------|----|
|                                              | cancer and bowel obstruction                                                                                                                  |                                                                             | <p><i>Treatment</i></p> <p>19 patients had been surgically debulked and 22 had received chemotherapy</p>                                                                                                                                                                                                                                                                                                                                                                                                                                              |                            |                              | vomited; 17% of patients complained of abdominal cramping and abdominal bloating was experienced by only 17% of patients. By discharge, 92% of patients were able to resume some type of oral intake. |    |
| Kawata 2014 Retrospective cohort study Japan | To evaluate the outcomes and safety of PEG for bowel decompression in a relatively larger number of patients with malignant bowel obstruction | 76<br><br>Median 62 years (range 21–83)<br><i>F</i> n= 32<br><i>M</i> n= 44 | <p><i>Diagnosis</i></p> <ul style="list-style-type: none"> <li>•Pancreatic cancer n= 27</li> <li>•Colorectal cancer n= 9</li> <li>•Gastric cancer n= 8</li> <li>•Duodenal cancer n= 2</li> <li>•Other gastrointestinal cancer n= 9</li> <li>•Gynecological cancer n=7</li> <li>•Urological cancer n=5</li> <li>•Other primary malignancy n= 9</li> </ul> <p>Peritoneal carcinomatosis - Absent 20, Present 56.</p> <p><i>Treatment</i></p> <ul style="list-style-type: none"> <li>•Chemotherapy n= 46</li> <li>•Best supportive care n= 30</li> </ul> | From gastrostomy placement | median 63 days (range 8–444) | Successful symptom relief was achieved in 53/55 of our patients                                                                                                                                       | NR |

|                                                             |                                                                                                                                                                                                                                                                                                         |                                                                                                                        |                                                                                       |                            |                                      |                                             |    |
|-------------------------------------------------------------|---------------------------------------------------------------------------------------------------------------------------------------------------------------------------------------------------------------------------------------------------------------------------------------------------------|------------------------------------------------------------------------------------------------------------------------|---------------------------------------------------------------------------------------|----------------------------|--------------------------------------|---------------------------------------------|----|
| Lilley<br>2018<br>Retrospective<br>cohort study<br>USA      | To compare the following outcomes after treatment for MBO among patients with stage IV ovarian or pancreatic cancer: 1) survival; 2) readmission for MBO; 3) EOL care outcomes, including hospice enrollment, ICU care in the last days of life, and location of death in an acute care hospital.       | 249<br><br>65-74 years n= 119 (47.8%)<br>75-84 years n= 109 (43.8%)<br>≥ 85 years n = 21 (8.8%)<br>F n= 212<br>M n= 37 | <i>Diagnosis</i><br><br>Ovarian n= 181<br>Pancreas n= 68<br><br><i>Treatment</i> - NR | From admission with MBO    | Median 38 (IQ range, 23-69) days.    | NR                                          | NR |
| Merchant<br>2020<br>Retrospective<br>cohort study<br>Canada | To (1) examine the incidence of IO, (2) describe current management of IO, and (3) explore the relationship between IO management and patient outcomes in a population-based cohort of patients with colorectal, ovarian, gastric, and pancreatic cancers in Ontario, Canada, in the last year of life. | 202<br><br>Age- NR<br><br>Sex- NR<br><br>100%                                                                          |                                                                                       | Not defined                | Median survival 47 days (IQR: 27-78) | NR                                          | NR |
| Pothuri<br>2005<br>Retrospective<br>cohort study            | To analyze the feasibility of using percutaneous endoscopic                                                                                                                                                                                                                                             | 94<br><br>Age-<br>Mean 56                                                                                              | <i>Diagnosis</i><br><br>Ovarian n=                                                    | From gastrostomy placement | median weeks (95% CI, 6–10)          | Symptomatic relief—the absence of nausea or | NR |

|                                                |                                                                                                                                                                         |                                                                           |                                                                                                                                                                                                                                                                                                                                |                            |                                     |                                                                                                                                                                                                                                                                                        |    |
|------------------------------------------------|-------------------------------------------------------------------------------------------------------------------------------------------------------------------------|---------------------------------------------------------------------------|--------------------------------------------------------------------------------------------------------------------------------------------------------------------------------------------------------------------------------------------------------------------------------------------------------------------------------|----------------------------|-------------------------------------|----------------------------------------------------------------------------------------------------------------------------------------------------------------------------------------------------------------------------------------------------------------------------------------|----|
| USA                                            | gastrostomy (PEG) tube placement in ovarian cancer patients with malignant bowel obstruction and to analyze the outcome of these patient                                | years (range 27-78)<br>F n= 94<br><br>100%                                | The majority of the patients (97%) had stage III or IV disease.<br><br><i>Treatment</i><br><br>89% had received three or more chemotherapy regimens prior to PEG tube placement.<br>Mean laparotomies prior to PEG tube placement was 1.94 (range, 1–6).<br>Thirty-seven of 94 patients had previous gastrointestinal surgery. |                            |                                     | vomiting— was noted in 86 (91%) of 94 patients with successful PEG tube placement, the mean number of days to achieve relief was 1.7 days. Diet tolerated with and without the PEG tube being clamped was as follows: none, 3; sips, 9; liquids, 40; soft/regular, 40; and unknown, 2. |    |
| Rath 2013<br>Retrospective cohort study<br>USA | To evaluate perioperative and survival outcomes of ovarian cancer patients undergoing percutaneous upper gastrointestinal decompression for malignant bowel obstruction | 53<br><br>Age- median 60 years (range 38–78 years)<br>F n= 53<br><br>100% | <i>Diagnosis</i><br><br>•Ovarian<br>•Fallopian tube<br>•Primary peritoneal cancer<br>*Numbers not reported<br><br><i>Treatment</i><br><br>Chemotherapy- median of 3 regimens, median time since last cycle of chemotherapy prior to                                                                                            | From gastrostomy placement | median s 46 days (range 2–736 days) | Forty-nine patients (92.5%) experienced control of symptoms (nausea and vomiting), defined as resolution of symptoms prior to                                                                                                                                                          | NR |

|                                                          |                                                                                                                                                           |                                                                   |                                       |                            |                                                                                            |                                                                                                                                                                                                                                                                                                                          |    |
|----------------------------------------------------------|-----------------------------------------------------------------------------------------------------------------------------------------------------------|-------------------------------------------------------------------|---------------------------------------|----------------------------|--------------------------------------------------------------------------------------------|--------------------------------------------------------------------------------------------------------------------------------------------------------------------------------------------------------------------------------------------------------------------------------------------------------------------------|----|
|                                                          |                                                                                                                                                           |                                                                   | gastrostomy placement was 1.4 months. |                            |                                                                                            | discharge; however, 46 patients required supplemental anti-emetic medication. Forty-eight (91%) patients were able to tolerate some form of oral intake: regular diet (8), soft diet (6) and liquid diet (34). Two patients tolerated tube feeds only and 2 patients were unable to tolerate any form of dietary intake. |    |
| Scheidbach 1999<br>Retrospective cohort study<br>Germany | In addition to establishing indications and outcome, were to identify specific aspects of tube placement and to determine the incidence of complications. | 24<br><br>Mean age 64 years (range 37 – 83 years)<br><br>Sex – NR | NR                                    | From gastrostomy placement | Average survival for the patients discharged home (20/24) was 21 weeks (range, 6–52 weeks) | documented as 24/24 (100%) relief as NGT not needed. Twenty-two patients (92%) were also soon able to take liquids or soft                                                                                                                                                                                               | NR |

|                                                            |                                                                                 |                                                                                    |                                                                                                                                                                                                                                                                                                     |                            |                                          |                                                                                                                                                                                                                                          |    |
|------------------------------------------------------------|---------------------------------------------------------------------------------|------------------------------------------------------------------------------------|-----------------------------------------------------------------------------------------------------------------------------------------------------------------------------------------------------------------------------------------------------------------------------------------------------|----------------------------|------------------------------------------|------------------------------------------------------------------------------------------------------------------------------------------------------------------------------------------------------------------------------------------|----|
|                                                            |                                                                                 | 100%                                                                               |                                                                                                                                                                                                                                                                                                     |                            |                                          | foods by mouth.                                                                                                                                                                                                                          |    |
| Teriaky<br>2012<br>Retrospective<br>cohort study<br>Canada | To determine the efficacy of venting PEG tubes in relieving nausea and vomiting | 7<br>Age-mean 62 (range 37-82)<br>F n= 4<br>M n= 3<br><br>100%                     | <i>Diagnosis</i><br><br>•Colon n= 3<br>•Pancreas n = 2<br>•Other n= 2<br><i>Treatment</i><br><br>•Surgery n= 6<br>•Adjuvant chemotherapy n= 5<br>•Radiotherapy n= 2<br><br>None of the patients underwent any further surgery, chemotherapy, or radiation therapy after insertion of a venting PEG. | From gastrostomy placement | mean a 119 days (range 6-484 days)       | There was relief of nausea and vomiting in 6 (86%) patients on the first day after PEG tube insertion, which persisted throughout hospitalization. Two patients were able to tolerate liquids and 3 patients were able to tolerate food. | NR |
| Vashi<br>2012<br>Retrospective<br>cohort study<br>USA      | Not stated                                                                      | 73<br>Age-Mean 53.3 years (range: 22.3–69 years)<br>F n= 54<br>M n= 19<br><br>100% | <i>Diagnosis</i><br><br>Majority (n = 27) had cancers of the female genital tract and stage III (n = 22) or IV (n = 27) disease at diagnosis, others not reported. All had advanced abdominal carcinomatosis-induced bowel obstruction.<br><br><i>Treatment</i> - NR                                | From gastrostomy placement | "average" 83.7 days (range: 20–338 days) | All patients had the PEG tube functioning well after the procedure with immediate relief of obstructive symptoms of persistent nausea and vomiting.                                                                                      | NR |

|                                                                     |                                                                                                                                                                                                                                       |                                                            |                                                                                                                                                                                                                                                                                                                                                                                                                                                                                                                                                                                                                                                                                       |                                           |                                                  |                                                                                                                                                                                                                                                                                                |                                                                                                                                                                                                                                                                                                                                                                                                                                                |
|---------------------------------------------------------------------|---------------------------------------------------------------------------------------------------------------------------------------------------------------------------------------------------------------------------------------|------------------------------------------------------------|---------------------------------------------------------------------------------------------------------------------------------------------------------------------------------------------------------------------------------------------------------------------------------------------------------------------------------------------------------------------------------------------------------------------------------------------------------------------------------------------------------------------------------------------------------------------------------------------------------------------------------------------------------------------------------------|-------------------------------------------|--------------------------------------------------|------------------------------------------------------------------------------------------------------------------------------------------------------------------------------------------------------------------------------------------------------------------------------------------------|------------------------------------------------------------------------------------------------------------------------------------------------------------------------------------------------------------------------------------------------------------------------------------------------------------------------------------------------------------------------------------------------------------------------------------------------|
| <p>Zucchi<br/>2016<br/>Retrospective<br/>cohort study<br/>Italy</p> | <p>The aim of this study is to examine, in a large single-centre cohort of 158 successive patients with MBO and abdominal carcinomatosis from advanced gynaecological and gastroenteric cancer, the efficacy and outcomes of PEG.</p> | <p>158<br/><br/>Age- NR<br/><br/>Sex- NR<br/><br/>100%</p> | <p><i>Diagnosis</i></p> <ul style="list-style-type: none"> <li>• Colon carcinoma n= 13</li> <li>• Gastric carcinoma n= 7</li> <li>• Gallbladder carcinoma n= 2</li> <li>• Breast carcinoma n= 2</li> <li>• Pancreas carcinoma n= 2</li> <li>• Ovarian carcinoma n= 96</li> <li>• Portio carcinoma n= 6</li> <li>• Endometrial carcinoma n= 8</li> <li>• Uterine sarcoma n= 6</li> </ul> <p>Malignant small bowel obstruction from abdominal-pelvic carcinomatosis</p> <p><i>Treatment</i></p> <p>All patients had at least one previous gastrointestinal surgical procedure (19.7 % had one surgical procedure, 42.2 % had two, 28.1 % had three, 7.7 % had four, 2.1 % had five)</p> | <p>From<br/>gastrostomy<br/>placement</p> | <p>Median 57<br/>days<br/>(Range 4-<br/>472)</p> | <p>110 (77.4 %) experienced complete relief from nausea and vomiting and were able to resume oral liquids and small amounts of soft food intake for a median of 57 days with self-reported satisfaction. Twelve patients (8.4 %) had only nausea, while 20 (14 %) had persistent vomiting.</p> | <p>25 patients had an SDS score properly evaluated. Sixteen (64 %) improved (41 vs 32.6, pre- and post-PEG median scores, respectively, <math>p &lt; 0.01</math>), two (8 %) at a further assessment showed the same scores as at baseline, and seven (28 %) had non-significant worsening (30.85 vs 36.14, <math>p=0.18</math>) of QoL. Of the 16 patients who showed an improvement in the QoL, nine reported an improvement of symptoms</p> |
|---------------------------------------------------------------------|---------------------------------------------------------------------------------------------------------------------------------------------------------------------------------------------------------------------------------------|------------------------------------------------------------|---------------------------------------------------------------------------------------------------------------------------------------------------------------------------------------------------------------------------------------------------------------------------------------------------------------------------------------------------------------------------------------------------------------------------------------------------------------------------------------------------------------------------------------------------------------------------------------------------------------------------------------------------------------------------------------|-------------------------------------------|--------------------------------------------------|------------------------------------------------------------------------------------------------------------------------------------------------------------------------------------------------------------------------------------------------------------------------------------------------|------------------------------------------------------------------------------------------------------------------------------------------------------------------------------------------------------------------------------------------------------------------------------------------------------------------------------------------------------------------------------------------------------------------------------------------------|



|  |  |  |  |  |  |  |                                                                                                                                                                                                                                                                                                                                                                                                                                                                                                     |
|--|--|--|--|--|--|--|-----------------------------------------------------------------------------------------------------------------------------------------------------------------------------------------------------------------------------------------------------------------------------------------------------------------------------------------------------------------------------------------------------------------------------------------------------------------------------------------------------|
|  |  |  |  |  |  |  | <p>at physical (19.6 vs 14.75, <math>p &lt; 0.01</math>), psychological (10.1 vs 7.3, <math>p &lt; 0.05</math>), and somatopsychic levels (11.25 vs 9.2, <math>p &lt; 0.05</math>). Regarding diet tolerance, all were able to resume oral liquid and small amounts of soft food intake. Of the remaining seven patients, one reported improvement at the physical level, three at the psychological level, and three at the somatopsychic level. The worsening of global QoL was determined by</p> |
|--|--|--|--|--|--|--|-----------------------------------------------------------------------------------------------------------------------------------------------------------------------------------------------------------------------------------------------------------------------------------------------------------------------------------------------------------------------------------------------------------------------------------------------------------------------------------------------------|

|  |  |  |  |  |  |  |                                                                                                                                                                                             |
|--|--|--|--|--|--|--|---------------------------------------------------------------------------------------------------------------------------------------------------------------------------------------------|
|  |  |  |  |  |  |  | the persistence of the physical symptoms (14.57 vs 20, $p < 0.05$ ) while psychological and somatopsychic levels remained stable. Symptom Distress Scale (SDS) of McCorkle and Young (1978) |
|--|--|--|--|--|--|--|---------------------------------------------------------------------------------------------------------------------------------------------------------------------------------------------|
