# Supplementary material
Source: HighWire-hosted journal article supplement (https://spcare.bmj.com/content/13/e3/e515)
Supplement: inline-supplementary-material-4 [file inline-supplementary-material-4.pdf]

*Health Service Utilisation and Place of Death*

| Study                       | Discharge status                   | Place of death |           | Length of stay                                                                                | Readmissions/<br>hospitalisations                                                                                                                                                                                                                                                                                                          | ICU admissions                                                         |
|-----------------------------|------------------------------------|----------------|-----------|-----------------------------------------------------------------------------------------------|--------------------------------------------------------------------------------------------------------------------------------------------------------------------------------------------------------------------------------------------------------------------------------------------------------------------------------------------|------------------------------------------------------------------------|
| <b>Parenteral Nutrition</b> |                                    |                |           |                                                                                               |                                                                                                                                                                                                                                                                                                                                            |                                                                        |
| August 1991                 |                                    |                |           |                                                                                               | Three patients readmitted to evaluate complications possibly related to HPN.                                                                                                                                                                                                                                                               |                                                                        |
| Bond 2019                   |                                    |                |           | Follow a series of improvement measure length of stay was reduced from 29.4 days to 10.1 days |                                                                                                                                                                                                                                                                                                                                            |                                                                        |
| Brard 2006                  |                                    |                | TPN n= 28 | No TPN N = 27                                                                                 |                                                                                                                                                                                                                                                                                                                                            |                                                                        |
|                             |                                    | Home           | 11 (39%)  | 10 (37%)                                                                                      |                                                                                                                                                                                                                                                                                                                                            |                                                                        |
|                             |                                    | Hospital       | 9 (32%)   | 7 (26%)                                                                                       |                                                                                                                                                                                                                                                                                                                                            |                                                                        |
|                             |                                    | Hospice        | 8 (29%)   | 10 (37%)                                                                                      |                                                                                                                                                                                                                                                                                                                                            |                                                                        |
| Chouhan 2016                |                                    |                |           |                                                                                               | Sixty-three (76.8%) patients required hospitalization after the initiation of systemic chemotherapy and TPN. The median number of hospitalizations was 2 (range, 1–11), and the median time spent hospitalized was 26.5 days (range, 4–167 days). On average, patients spent 38% (range, 1–100%) of their remaining lives in the hospital. | 23 of those hospitalised patients admitted to the intensive care unit. |
| Duerksen 2004               | Five of nine were discharged home. |                |           |                                                                                               | One patient had five admissions.                                                                                                                                                                                                                                                                                                           |                                                                        |

|                                              |                                                                                                                                            |                                                                                             |                                                                                                                                          |                                                                                                                                                                                                                                                                                                       |                                      |
|----------------------------------------------|--------------------------------------------------------------------------------------------------------------------------------------------|---------------------------------------------------------------------------------------------|------------------------------------------------------------------------------------------------------------------------------------------|-------------------------------------------------------------------------------------------------------------------------------------------------------------------------------------------------------------------------------------------------------------------------------------------------------|--------------------------------------|
| Dzierianowski 2021                           |                                                                                                                                            |                                                                                             |                                                                                                                                          | Median 0 (range 0-13)                                                                                                                                                                                                                                                                                 |                                      |
| Keane 2018                                   |                                                                                                                                            | Most patients passed away in their homes or hospice (77.9%)                                 |                                                                                                                                          |                                                                                                                                                                                                                                                                                                       |                                      |
| King 1993                                    |                                                                                                                                            |                                                                                             |                                                                                                                                          | 124 hospitalisations occurred during HPN. Thirty-seven admissions were for cancer therapy, 76 were for disease complications, and 11 were for HPN-related complications. Mean number of admissions was 2.0, median was 1, with a range of 0-11. Twenty-six percent of HPN patients had no admissions. |                                      |
| Patel 2021                                   |                                                                                                                                            |                                                                                             | Median length of stay was 13 days, with greater length of stay in those referred for PN than those who were not (28 vs. 9 day, P=0.0001) | The median number of readmissions was 1 (range 1-12).                                                                                                                                                                                                                                                 | Median number of ICU admission was 0 |
| <b><i>Palliative Venting Gastrostomy</i></b> |                                                                                                                                            |                                                                                             |                                                                                                                                          |                                                                                                                                                                                                                                                                                                       |                                      |
| Adelson 1993                                 |                                                                                                                                            | 1 patient died in hospital on supportive care.                                              |                                                                                                                                          |                                                                                                                                                                                                                                                                                                       |                                      |
| Brooksbank 2002                              | Following insertion of the gastrostomy, 20 patients could be discharged home. Four other patients were transferred to country hospitals to | Six patients died at home and two patients were readmitted for the final few hours of life. |                                                                                                                                          |                                                                                                                                                                                                                                                                                                       |                                      |

|                 |                                                                                                                         |                                                        |                                                                               |                                                                                                                                                                                                    |  |
|-----------------|-------------------------------------------------------------------------------------------------------------------------|--------------------------------------------------------|-------------------------------------------------------------------------------|----------------------------------------------------------------------------------------------------------------------------------------------------------------------------------------------------|--|
|                 | continue care nearer to home.                                                                                           |                                                        |                                                                               |                                                                                                                                                                                                    |  |
| Cannizarro 1995 |                                                                                                                         | Four in hospital                                       |                                                                               |                                                                                                                                                                                                    |  |
| Cunningham 1995 | Twelve (60%) patients returned home for terminal care for 3 to 173 days (mean 70)                                       |                                                        |                                                                               |                                                                                                                                                                                                    |  |
| Dittrich 2017   | 44 patients (59%) were discharged (home 36 patients, inpatient hospice 5, nursing facility 3)                           | Hospital n= 46<br>Home n= 23<br>Inpatient hospice n= 6 | Median length of stay was 8.5 days (range 1–28)                               | Readmission rate was 48% (21/44 patients, range 1–5 readmissions)                                                                                                                                  |  |
| Diver 2013      |                                                                                                                         |                                                        |                                                                               | 48 women (42%) were readmitted to the hospital at least once after GT placement due to GT related events                                                                                           |  |
| Gauvin 2021     | <ul style="list-style-type: none"> <li>•Home n= 22</li> <li>•Rehabilitation/SNF n= 7</li> <li>•Hospice n= 25</li> </ul> |                                                        |                                                                               |                                                                                                                                                                                                    |  |
| Goldberg 2021   | Hospice enrolment<br>Yes n= 95<br>No n= 22                                                                              | Discharge status<br>Alive n= 117<br>Dead n= 8          | Length of stay for those discharged alive, days, median 10.0 (range 0.0-38.0) |                                                                                                                                                                                                    |  |
| Issaka 2014     |                                                                                                                         |                                                        |                                                                               | Four patients were re-admitted for recurrent symptoms due to VPEG tube dysfunction caused by clogging, and all were successfully replaced. Seven patients (7.9 %) were re-admitted for obstructive |  |

|                |                                                                                                                                                                                                                                                                                                |                                                                       |                                                                                                                                                               |                                                                                                                                                                                                                                                                                                                      |                        |
|----------------|------------------------------------------------------------------------------------------------------------------------------------------------------------------------------------------------------------------------------------------------------------------------------------------------|-----------------------------------------------------------------------|---------------------------------------------------------------------------------------------------------------------------------------------------------------|----------------------------------------------------------------------------------------------------------------------------------------------------------------------------------------------------------------------------------------------------------------------------------------------------------------------|------------------------|
|                |                                                                                                                                                                                                                                                                                                |                                                                       |                                                                                                                                                               | symptoms despite a functioning VPEG tube.                                                                                                                                                                                                                                                                            |                        |
| Jolicouer 2003 | Fifty-eight per cent were discharged home with a primary caregiver. A quarter of patients were discharged to a hospice. Thirteen per cent died in hospital within 26 days of being admitted for their bowel obstruction and one patient was transferred to a community hospital close to home. | Thirteen per cent died in hospital                                    |                                                                                                                                                               | Of the 20 patients discharged from the acute care setting, 30% (n=6) required re-admission post-PEG insertion. A total of 20 readmissions were required, 70% did not require re-admission. The first re-admission occurred on average within 21.7 days of the patient being discharged (range from five to 60 days). |                        |
| Lilley 2018    | Hospice enrolled n = 190 (76.4%)                                                                                                                                                                                                                                                               | Death in hospital n= 34 (13.8%)                                       |                                                                                                                                                               |                                                                                                                                                                                                                                                                                                                      | ICU Care n= 32 (12.8%) |
| Merchant 2020  |                                                                                                                                                                                                                                                                                                | Death in hospital- 67/135                                             | Median length of stay 23 days (IQR: 13-37)                                                                                                                    | Patient readmissions for MBO- 16/135 (11.9%)                                                                                                                                                                                                                                                                         |                        |
| Pothuri 2005   |                                                                                                                                                                                                                                                                                                | Seventy-five (85%) of 88 patients died at home or under hospice care. | Five patients were able to leave the hospital the day of PEG tube placement, and 88 remained in the hospital for a mean stay of 6.9 days after the procedure. |                                                                                                                                                                                                                                                                                                                      |                        |

|                 |                                                                                                                                                                                          |                                                                                                        |                                                                                                                                                                                                                    |                                                                                                                                                                                                        |  |
|-----------------|------------------------------------------------------------------------------------------------------------------------------------------------------------------------------------------|--------------------------------------------------------------------------------------------------------|--------------------------------------------------------------------------------------------------------------------------------------------------------------------------------------------------------------------|--------------------------------------------------------------------------------------------------------------------------------------------------------------------------------------------------------|--|
| Rath 2013       | 71.7% were discharged home; 9.4% to an inpatient hospice facility, 15.1% to a nursing facility, and there were two inpatient deaths. Sixteen patients (30.2%) opted for hospice services | Two inpatient deaths                                                                                   | The median length of stay prior to placement of PDT was 6 days (range 1–27).                                                                                                                                       |                                                                                                                                                                                                        |  |
| Scheidbach 1999 | 83% discharged to home after PEG/PEJ (not stated where they died), 4 died in hospital.                                                                                                   | Four hospital deaths                                                                                   | Average stay after PEG/PEJ placement was 6 days, range 3 - 31 days - except for 4 patients who could not be discharged secondary to disability - all died in hospital within days (up to 4 weeks) after treatment. |                                                                                                                                                                                                        |  |
| Teriaky 2012    |                                                                                                                                                                                          | 3 at home, 4 in hospital (3 of which after re-admission)                                               |                                                                                                                                                                                                                    | 4 (67%) patients requiring re-admission for end stage palliation in hospital. The average length of time spent at home prior to readmission for in-hospital palliation was 126 days (range 7-467 days) |  |
| Zucchi 2016     | Out of 142 patients, 116 (81.6 %) were discharged                                                                                                                                        | Twenty-six (18.3 %) out of 142 deaths occurred during the hospital stay because of disease progression | The median postoperative hospital stay                                                                                                                                                                             |                                                                                                                                                                                                        |  |

|  |  |  |                             |  |  |
|--|--|--|-----------------------------|--|--|
|  |  |  | was 9 days<br>(range 3–60). |  |  |
|--|--|--|-----------------------------|--|--|
